1           **Diclofenac and other Non-Steroidal Anti-Inflammatory Drugs**  
2           **(NSAIDs) are Competitive Antagonists of the human P2X3 Receptor**

3           **Laura Grohs<sup>1,2</sup>, Linhan Cheng<sup>1</sup>, Saskia Cönen<sup>1,3</sup>, Bassam G. Haddad<sup>3</sup>, Astrid Obrecht<sup>1,4</sup>,**  
4           **Idil Toklucu<sup>5</sup>, Lisa Ernst<sup>6</sup>, Jannis Körner<sup>5,7</sup>, Günther Schmalzing<sup>1</sup>, Angelika Lampert<sup>5</sup>, Jan-**  
5           **Philipp Machtens<sup>1,3</sup>, Ralf Hausmann<sup>1\*</sup>**

6           <sup>1</sup>Institute of Clinical Pharmacology, RWTH Aachen University, Aachen, Germany

7           <sup>2</sup>Department of Neurology, University Hospital, RWTH Aachen University, Aachen, Germany

8           <sup>3</sup>Molecular and Cellular Physiology (IBI-1), Institute of Biological Information Processing (IBI),  
9           Forschungszentrum Jülich, Jülich, Germany

10          <sup>4</sup>Department of Plastic Surgery, Hand Surgery - Burn Center, University Hospital, RWTH  
11          Aachen University, Aachen, Germany

12          <sup>5</sup>Institute of Physiology (Neurophysiology), RWTH Aachen University, Aachen, Germany

13          <sup>6</sup>Institute for Laboratory Animal Science and Experimental Surgery, RWTH Aachen University,  
14          Aachen, Germany

15          <sup>7</sup>Department of Anesthesiology, University Hospital, RWTH Aachen University, Aachen,  
16          Germany

17          \***Correspondence:**

18          Ralf Hausmann, M.D.  
19          Institute of Clinical Pharmacology, RWTH Aachen University,  
20          Wendlingweg 2, D-52074 Aachen, Germany.  
21          Phone +49-241-8089135; Fax +49-241-8082433  
22          E-mail address: [rhausmann@ukaachen.de](mailto:rhausmann@ukaachen.de)

23

24          **Word count:**           Number of words: 11,662  
25                                   Number of figures: 7  
26                                   Number of tables: 2  
27                                   Number of suppl. material: 7 Figures, 1 Table

28          **Keywords:** P2X3 receptor, nociception, chronic pain, non-steroidal anti-inflammatory drugs  
29          (NSAIDs), competitive antagonist, drug screening

30

31

## 32 **Abstract**

33 The P2X3 receptor (P2X3R), an ATP-gated non-selective cation channel of the P2X receptor  
34 family, is expressed in sensory neurons and involved in nociception. P2X3R inhibition was shown  
35 to reduce chronic and neuropathic pain. In a previous screening of 2000 approved drugs, natural  
36 products and bioactive substances, various non-steroidal anti-inflammatory drugs (NSAIDs) were  
37 found to inhibit P2X3R-mediated currents. To investigate whether the inhibition of P2X receptors  
38 contributes to the analgesic effect of NSAIDs, we characterized the potency and selectivity of  
39 various NSAIDs at P2X3R and other P2XR subtypes using two-electrode voltage clamp  
40 electrophysiology. We identified diclofenac as a hP2X3R and hP2X2/3R antagonist with  
41 micromolar potency (with IC<sub>50</sub> values of 138.2 μM and 76.7 μM, respectively). A weaker  
42 inhibition of hP2X1R, hP2X4R and hP2X7R by diclofenac was determined. Flufenamic acid  
43 (FFA) proved to inhibit hP2X3R, rP2X3R and hP2X7R (IC<sub>50</sub> values of 221μM, 264.1μM and ~  
44 900μM, respectively), questioning its widespread use as a nonselective ion channel blocker, when  
45 P2XR-mediated currents are under study.

46 Inhibition of the hP2X3R or hP2X2/3R by diclofenac could be overcome by prolonged ATP-  
47 application or increasing concentrations of the agonist α,β-meATP, respectively, indicating  
48 competition of diclofenac and the agonists. Molecular dynamics simulation showed that  
49 diclofenac largely overlaps with ATP bound to the open state of the hP2X3R. Our results strongly  
50 support a competitive antagonism through which diclofenac, by interacting with residues of the  
51 ATP-binding site, left flipper, and dorsal fin domains inhibits gating of P2X3R by conformational  
52 fixation of the left flipper and dorsal fin domains.

53 In summary, we demonstrate the inhibition of the human P2X3 receptor by various NSAIDs.  
54 Diclofenac proved to be the most effective antagonist with a strong inhibition of hP2X3R and  
55 hP2X2/3R and a weaker inhibition of hP2X1R, hP2X4R and hP2X7R. Considering their  
56 involvement in nociception, inhibition of hP2X3R and hP2X2/3R by micromolar concentrations  
57 of diclofenac may contribute to the analgesic effect as well as the side effect of taste disturbances  
58 of diclofenac and represent an additional mode of action besides the well-known high potency  
59 COX inhibition.

60

## 61 **Contribution to the field statement**

62 P2X3 receptors (P2X3R) are ion channels of sensory neurons and are involved in nociception.  
63 P2X3R inhibition reduces neuropathic and chronic pain as well as chronic cough and taste  
64 sensations. A previous study suggested that several nonsteroidal anti-inflammatory drugs  
65 (NSAIDs) inhibit P2X3R. Here, we examined several NSAIDs at P2X3R and other related P2XR  
66 and identified diclofenac for the first time as an hP2X3R and hP2X2/3R antagonist with  
67 micromolar potency. Another NSAID, flufenamic acid proved to be an inhibitor of P2X3R and  
68 hP2X7R, questioning its widespread use as a nonselective ion channel blocker in P2XR assays.

69 Pharmacological experiments suggest a competitive mechanism of antagonism of diclofenac that  
70 was further supported by molecular dynamics simulations, which demonstrated that diclofenac  
71 interacts with the ATP binding site of the hP2X3R. The inhibition is caused by restricting the  
72 conformational flexibility of the left flipper and dorsal fin domains of P2X3R, which usually is  
73 crucial for ATP-induced channel opening.

74 Inhibition of hP2X3R and hP2X2/3R by micromolar concentrations of diclofenac may contribute  
75 to both the analgesic effect and the side effect of taste disturbance of diclofenac and may  
76 represent an additional mechanism of action besides the highly potent COX inhibition.

## 77 1 Introduction

78 P2X receptors (P2XR) constitute a family of non-selective cation channels gated by extracellular  
79 ATP (North and Barnard, 1997). Seven different subtypes (P2X1-7) can assemble to homo- or  
80 heterotrimers (Nicke et al., 1998, North, 2002).

81 For the P2X3R, which is expressed in sensory neurons (Chen et al., 1995), a crucial role in  
82 nociception has been demonstrated (Burnstock, 2016). P2X3-deficient mice exhibit an attenuated  
83 pain behavior after injection of ATP into the hind paw compared to wild-type mice (Cockayne et  
84 al., 2000), whereas the response to acute mechanical pain stimuli remains unchanged (Souslova et  
85 al., 2000). Accordingly, the pharmacological inhibition of P2X3R has been shown to effectively  
86 reduce chronic or neuropathic pain in rodents (Jarvis et al., 2002). Recently, the modulator  
87 TMEM163, a 289 amino acid transmembrane protein, was identified to be required for full  
88 function of the neuronal P2X3R- and P2X4R and pain-related ATP-evoked behavior in mice  
89 (Salm et al., 2020). In addition to P2X3R, an involvement in nociception could also be assigned  
90 to heterotrimeric P2X2/3R, P2X4R and P2X7R (Chessell et al., 2005, Cockayne et al., 2005,  
91 Tsuda et al., 2009). All of these seem to be more relevant for the development of neuropathic or  
92 inflammatory pain than for acute nociception (Chessell et al., 2005, Tsuda et al., 2009).

93 The important role of the P2X3R in nociception makes the P2X3R a promising target for the  
94 development of new analgesics (North and Jarvis, 2013). However, to this day none of the  
95 developed antagonists has been approved for clinical use as an analgesic, even if Gefapixant  
96 (formerly AF-219) is approved as an anti-cough agent in Japan (details are given below). One of  
97 the first potent and selective P2X3R (and P2X2/3R) antagonists was A-317491, which  
98 successfully reduced chronic pain in rodent models (Jarvis et al., 2002), but showed insufficient  
99 distribution into the central nervous system (Sharp et al., 2006). Several other P2X3R antagonists  
100 have been developed as clinical candidates, such as AF-219/gefapixant, BAY-1817080/eliapixant,  
101 BLU-5937, MK-3901 or S-600918/sivopixant (Niimi et al., 2022, Spinaci et al., 2021). The  
102 availability of the crystal structures of the human P2X3R (Mansoor et al., 2016), together with  
103 cryo-EM techniques is ideally suited to facilitate structure-based drug design for P2X3Rs by  
104 revealing and characterizing novel ligand-binding sites (Oken et al., 2022).

105 The most advanced is the development of gefapixant, a P2X3R and P2X2/3R antagonist, which  
106 effectively reduced chronic cough caused by hypersensitivity of the cough reflex in phase 2 and 3  
107 trials (Abdulqawi et al., 2015, Marucci et al., 2019). However, a taste disturbance was described  
108 as a side effect by all patients (Abdulqawi et al., 2015). Gefapixant as a first-in-class, non-  
109 narcotic, selective P2X3 receptor antagonist was recently approved for marketing in Japan as  
110 treatment for refractory or unexplained chronic cough (Markham, 2022). Another promising  
111 substance, BLU-5937, was able to effectively reduce chronic cough in animal models without  
112 altering taste sensation, possibly due to its considerably higher selectivity for P2X3R versus  
113 P2X2/3R (Garceau and Chauret, 2019). BLU-5937 is now part of a phase 2 study for the  
114 treatment of chronic cough (Marucci et al., 2019). Also, sivopixant was shown to reduce objective  
115 cough frequency and improved health-related quality of life, with a low incidence of taste  
116 disturbance, among patients with refractory or unexplained chronic cough in a phase 2a trial  
117 (Niimi et al., 2022). Eliapixant showed in its first-in-human study a favorable tolerability with no  
118 taste-related adverse events, and in a phase 1/2a study eliapixant showed reduced cough  
119 frequency and severity and was well tolerated with acceptable rates of taste-related events (Klein  
120 et al., 2022, Morice et al., 2014).

121 In light of the promising role of P2X3R antagonists for the treatment of pain and refractory  
122 cough, as well as the high likelihood of taste disturbances caused by not fully selective P2X3R  
123 antagonists (against heteromeric P2X2/3R), it appears interesting to investigate whether already  
124 approved drugs do affect the P2X3R mediated responses. For this purpose, a screening of 2000

125 approved drugs, natural products and bioactive substances was performed in a previous study of  
126 our group. In this screening, aurintricarboxylic acid (ATA) was identified as a potent P2X1R and  
127 P2X3R antagonist (Obrecht et al., 2019). An inhibitory effect could also be demonstrated for  
128 other drugs. These included various non-steroidal anti-inflammatory drugs (NSAIDs) and  
129 diclofenac showed the highest inhibitory effect of the screened NSAIDs. The analgesic,  
130 antipyretic and anti-inflammatory effect of NSAIDs is generally described to result from the  
131 inhibition of prostaglandin synthesis by inhibiting the cyclooxygenases COX-1 and COX-2  
132 (Vane, 1971). Most NSAIDs constitute reversible, competitive blockers of the enzyme  
133 Cyclooxygenase (COX), while acetylsalicylic acid (Aspirin<sup>®</sup>) can cause an irreversible  
134 inactivation of COX through acetylation of Serine 530 (DeWitt et al., 1990, Rome and Lands,  
135 1975).

136 Considering the involvement of P2X3R in nociception, it is conceivable that inhibition of P2X3R  
137 by NSAIDs represents an additional mode of action besides COX inhibition. To investigate  
138 whether the inhibition of P2XR contributes to the analgesic effect of NSAIDs, we determined the  
139 potency and selectivity of various NSAIDs at P2X3R and other P2XR subtypes using two-  
140 electrode voltage clamp (TEVC) electrophysiology. The investigated NSAIDs included  
141 diclofenac, ibuprofen, flunixin, meclofenamic acid, naproxen and flufenamic acid (FFA). The  
142 latter additionally plays an important role in research as a nonselective ion channel blocker  
143 (Guinamard et al., 2013).

144 In the present study, we have for the first time shown that diclofenac is a hP2X3R and hP2X2/3R  
145 antagonist with micromolar potency. Our results strongly support a competitive antagonism  
146 through which diclofenac, by interacting with residues of the ATP-binding site, left flipper, and  
147 dorsal fin domains inhibits gating of P2X3R by conformational fixation of the left flipper and  
148 dorsal fin domains. In addition, a weaker inhibition of hP2X1R, hP2X4R and hP2X7R was  
149 shown. A less potent inhibition of hP2X3R was observed for all other investigated NSAIDs. FFA  
150 proved to significantly inhibit hP2X3R, rP2X3R and hP2X7R, questioning its use as a  
151 nonselective ion channel blocker, when P2X-mediated currents are under study.

152

## 153 2 Materials & Methods

### 154 2.1 Chemicals

155 The investigated NSAIDs and most standard chemicals were purchased from Sigma-  
156 Aldrich/Merck (Taufkirchen, Germany), if not otherwise specified. ATP sodium salt and  $\alpha,\beta$ -  
157 meATP were purchased from Roche Diagnostics (Mannheim, Germany) and Tocris Bioscience  
158 (Bristol, United Kingdom), respectively. Collagenase type 2 was purchased from Worthington  
159 Biochemical Corp. (Lakewood, USA and distributed by CellSystems, Troisdorf, Germany).

### 160 2.2 Expression of P2X receptors in *Xenopus laevis* oocytes

161 Oocyte expression plasmids encoding the wild-type (wt) and His-tagged hP2X2R, hP2X3R,  
162 hP2X4R and hP2X7R, the mutant His-<sup>20</sup>RMVL<sup>23</sup>KVIV<sup>23</sup>S<sup>26</sup>N-hP2X1R, S<sup>15</sup>V-rP2X3R and His-  
163 S<sup>15</sup>V-hP2X3R were available from previous studies (Hausmann et al., 2006, Hausmann et al.,  
164 2014, Obrecht et al., 2019, Wolf et al., 2011). Capped cRNAs of the different P2XR were already  
165 available in the research group or were synthesized as previously described (Schmalzing et al.,  
166 1991, Stolz et al., 2015). cRNA was injected into collagenase-defolliculated *Xenopus laevis*  
167 oocytes in aliquots of 41nl or 23nl (see Suppl. Tbl. 1 for the amount of cRNA used for expression  
168 of the indicated P2XR) using a Nanoliter 2000 injector (World Precision Instruments, Sarasota,  
169 United States of America) as described previously (Hausmann et al., 2014, Obrecht et al., 2019,  
170 Stolz et al., 2015). To express the heteromeric hP2X2/3 receptor, cRNAs encoding His-hP2X2R  
171 and wt-hP2X3R were coinjected at a ratio (w/w) of 1:6. Oocytes were stored at 19°C in oocyte  
172 ringer solution (ORi<sup>+</sup>) containing 90 mM NaCl, 1 mM KCl, 1 mM CaCl<sub>2</sub>, 1 mM MgCl<sub>2</sub> and  
173 10 mM HEPES (Carl Roth, Karlsruhe, Germany) adjusted to pH 7.4 with NaOH and  
174 supplemented with 50 µg/ml gentamicin (AppliChem, Darmstadt, Germany). The procedures  
175 followed for maintaining and surgical treatment of *X. laevis* adults were approved by the  
176 governmental animal care and use committee of the State Agency for Nature, Environment and  
177 Consumer Protection (LANUV, Recklinghausen, Germany; reference no. 81-02.04.2019.A355),  
178 in compliance with Directive 2010/63/EU of the European Parliament and of the Council on the  
179 protection of animals used for scientific purposes.

### 180 2.3 Two-electrode voltage clamp electrophysiology

181 Ion currents mediated by P2X receptors were evoked by the indicated concentration of ATP or  
182  $\alpha,\beta$ -meATP and were recorded one or two days after cRNA injection at ambient temperature at a  
183 holding potential of -60mV by two-electrode voltage clamp (TEVC) as previously described  
184 (Hausmann et al., 2006). Calcium-free ORi<sup>-</sup> solution (90 mM NaCl, 1 mM KCl, 2 mM MgCl<sub>2</sub>, 10  
185 mM HEPES, pH 7.4) was used to avoid bias due to Calcium activated Chloride Channels (CaCC)  
186 endogenously expressed in *X. laevis* oocytes (Methfessel et al., 1986, Miledi, 1982). For  
187 recordings of the wt-hP2X7R the composition of the ORi<sup>-</sup> solution was modified according to  
188 protocols described previously and contained: 100 mM NaCl, 2.5 mM KCl, 1 mM MgCl<sub>2</sub>, 5 mM  
189 HEPES, pH 7.4 (Klapperstück et al., 2000). The oocytes were continuously superfused with ORi<sup>-</sup>  
190 by gravity flow (5-10ml/min). The agonists ATP or  $\alpha,\beta$ -meATP and the investigated NSAIDs  
191 were diluted in ORi<sup>-</sup> on the day of the recording. The following agonist concentrations were used  
192 for the different P2X subtypes: 1 µM ATP (hP2X1R mutant, hP2X3R, rP2X3R, S<sup>15</sup>V-hP2X3R,  
193 S<sup>15</sup>V-rP2X3R), 10 µM ATP (hP2X2R, hP2X4R), 300 µM free ATP<sup>4-</sup> (hP2X7R), 1 µM  $\alpha,\beta$ -  
194 meATP (hP2X2/3R). A peak current protocol was used to analyse fast- and intermediate  
195 desensitizing P2XR subtypes (P2X1R, P2X3R, S<sup>15</sup>V-P2X3R) and a steady-state protocol was  
196 used for slowly- or partially-desensitizing P2X subtypes (P2X2R, P2X2/3R, P2X4R). For  
197 recordings of the P2X7R a modified steady-state protocol was used (Hausmann et al., 2006). The  
198 application of the different bath solutions was controlled by computer-operated magnetic valves  
199 controlled by the CellWorks E 5.5.1 software (npi electronic, Tamm, Germany).

## 200 **2.4 Pig Dorsal Root Ganglia Preparation**

201 Dorsal Root Ganglia (DRG) of pigs were sampled according to the 3R criteria for reductions in  
202 animal use, as leftovers from previous independent animal studies (e.g. LANUV reference no.  
203 81-02.04.2018.A051). For this purpose, pigs of the German Landrace breed, with an average age  
204 of 15 weeks (14.6 SD2.7) and weight of 47.3kg (SD11.2) were euthanized using an overdose of  
205 pentobarbital 60 mg/kg body weight. Subsequently, the DRG were collected. The DRG of pigs  
206 were transferred on ice and fine excision was performed in ice-cold DMEM F12 medium  
207 containing 10 % FBS. DRG were treated with 1mg/ml collagenase P, 1 mg/ml trypsin T1426 and  
208 0,1 mg/ml DNase for digestion. DRG were cut into small pieces inside the digestion medium for  
209 surface enlargement. DRG were incubated in 37 °C, 5 % CO<sub>2</sub> for 120 minutes ± 30 minutes.  
210 Approximately after 60 minutes in digestion medium, DRG were triturated using a glass pipette.  
211 After the full incubation time, DRG were triturated three times using glass pipettes with  
212 decreasing tip diameter. For further purification, DRG were centrifuged at 500 G and 4 °C twice  
213 for four minutes each and the pellets were suspended in DMEM F12 with 10 % FBS. DRG were  
214 subsequently separated from the lighter cell fragments and myelin by centrifugation of a Percoll  
215 gradient containing a 60 % Percoll and a 25 % Percoll gradient for 20 minutes at 500G. DRG  
216 neurons were plated on coverslips coated with poly-D-lysine (100 µg/ml), laminin (10 µg/ml) and  
217 fibronectin (10 µg/ml). Neurons were then cultured in neurobasal A medium supplemented with  
218 B27, penicillin, streptomycin and L-glutamine and used for voltage-clamp recordings after 12-72  
219 hours in culture.

## 220 **2.5 Whole-Cell Patch-Clamp Recordings of Pig DRG Neurons**

221 Whole-cell voltage clamp recordings of DRG neurons were performed using glass electrodes with  
222 micropipette tip resistances of 1,3-3,5 MΩ, pulled and fire-polished with a Zeitz DMZ-puller. The  
223 intracellular solution contained 10 mM NaCl, 140 mM CsF, 10 mM HEPES, 1 mM EGTA, 5 mM  
224 glucose, 5 mM TEA-Cl (adjusted to pH 7.3 using CsOH). The extracellular bathing solution  
225 contained 140 mM NaCl, 3 mM KCl, 1 mM MgCl<sub>2</sub>, 1mM CaCl<sub>2</sub>, 10 mM HEPES and 20 mM  
226 glucose (adjusted to pH 7.4 using NaOH). The liquid junction potential was corrected by -7.8 mV.  
227 Membrane currents were measured at room temperature with a holding potential of -77.8 mV  
228 using a HEKA EPC-10 USB amplifier. 10 µM α,β-methylene ATP and 100 µM Diclofenac were  
229 applied using a gravity-driven perfusion system during the recordings. PatchMaster/FitMaster  
230 software (HEKA Electronics) and IgorPro (WaveMetrics) were used for data acquisition and  
231 analysis. Signals were digitized at a sampling rate of 5 kHz. The low-pass filter frequency was set  
232 to 10 kHz. Series resistance compensation was between 2.5 and 11.1 MΩ.

## 233 **2.6 Data Analysis**

234 The recorded TEVC-currents were analyzed using CellWorks Reader 6.2.2 (npi electronic,  
235 Tamm, Germany) and Microsoft Excel (Microsoft Corporation, Redmond, USA). The displayed  
236 current traces were generated with Igor Pro 6.21 (WaveMetrics, Portland, USA) and edited with  
237 Microsoft PowerPoint (Microsoft Corporation, Redmond, USA). To generate concentration-  
238 response curves, non-linear regression analysis was performed using GraphPad Prism 5  
239 (GraphPad Software, San Diego, United States of America).

240 Antagonist concentration–response data and IC<sub>50</sub> values were calculated by normalizing ATP-  
241 induced responses to the control responses (recorded in the presence and absence of antagonist,  
242 respectively). The four-parameter Hill equation (Eq. (1)) was iteratively fitted to data collected  
243 from a minimum of four independent repeat experiments to obtain antagonist concentration–  
244 response curves and IC<sub>50</sub> values.

$$245 \quad \frac{I_{Ant}}{I_{max}} = \frac{top-bottom}{1 + \left(\frac{[Ant]}{IC_{50}}\right)^{nH}} + bottom \quad (1)$$

246  $I_{max}$  is the control response in the absence of antagonist,  $I_{Ant}$  is the response at the given antagonist  
247 concentration  $[Ant]$ , and  $IC_{50}$  is the antagonist concentration that causes 50% inhibition of the  
248 response elicited by a given agonist concentration. The ratio between the response in presence of  
249 a certain antagonist concentration and the control response in absence of the antagonist is  
250 indicated as “% control current”.

251 In case of fast-desensitizing P2XR subtypes (P2X1R, P2X3R), ATP is applied five times in  
252 repetition and the ATP-induced current amplitude in the presence (after pre-incubation) of the  
253 antagonist (fourth application) is compared to the arithmetic mean of flanking control ATP-  
254 induced current amplitudes in the absence of the antagonist (third and fifth ATP application).  
255 Since some of the investigated NSAIDs showed an enduring, potentially irreversible inhibitory  
256 effect on the current amplitude, only the preceding (third) ATP-induced current amplitude was  
257 used to calculate the control current. The typical run-down of current amplitudes between  
258 consecutive, repetitive ATP applications was considered by applying a correction factor. The  
259 correction factor was calculated as the ratio of the fourth ATP-induced current amplitude to the  
260 third amplitude (Eq. (3)), when the experiment was performed in absence of the antagonist. When  
261 the experiment was performed in presence of the antagonist, the ATP-induced current amplitude  
262 of the preceding current (third amplitude) was multiplied by this correction factor / quotient (Eq.  
263 (4)) to obtain a control current corrected for the run-down effect. Since the magnitude of the run  
264 down varies from day to day and batch to batch of oocytes, the correction factor was determined  
265 on each day of experiments and was calculated as the arithmetic mean of several recordings on  
266 each day.

$$267 \quad correction\ factor = \frac{ATP-induced\ current\ amplitude\ 4\ in\ absence\ of\ antagonist}{ATP-induced\ current\ amplitude\ 3\ in\ absence\ of\ antagonist} \quad (3)$$

$$268 \quad \% \text{ control current} = \frac{ATP-induced\ current\ amplitude\ 4\ in\ presence\ of\ antagonist}{ATP-induced\ current\ amplitude\ 3\ in\ absence\ of\ antagonist \cdot correction\ factor} \quad (4)$$

269 In case of the hP2X7R, the control current in absence of the antagonist had to be extrapolated  
270 (Suppl. Fig. 4, 5) presuming a linear increase of permeability during continuous ATP application  
271 (North, 2002), since the permeability of the receptor is affected by the antagonist.

272 The  $IC_{50}$  values are displayed as geometric means with 95% confidence intervals (95% CI). All  
273 other values (including % control current or % inhibition) are presented as arithmetic means  $\pm$   
274 SEM.

## 275 **2.7 hP2X3R X-ray structure-based molecular dynamics simulations and evaluation of** 276 **diclofenac binding**

277 The human ionotropic cation-selective ATP receptor P2X3 was modeled based on its structure in  
278 the open state (PDBID: 5SVK) and apo-closed state (PDBID: 5SVJ) (Mansoor et al., 2016) and  
279 embedded in a 1-palmitoyl-2-oleoyl-phosphatidylcholine (POPC) bilayer using the g\_membed  
280 functionality (Wolf et al., 2010) in GROMACS. Modeller was used to build the single-point  
281 mutant L191A of the P2X3 apo-closed state in order to make the supposed binding cavity of  
282 diclofenac easier accessible to be able to simulate the binding event within the  $\mu$ s-time-scale of  
283 Molecular Dynamics simulations (Fiser and Sali, 2003). The system was simulated in  
284 GROMACS (Abraham et al., 2015) version 2021 using a time step of 2 fs.

285 A pressure of 1 bar was applied semi-isotropically with a Berendsen barostat (Berendsen et al.,  
286 1984) using a time constant of 5 ps. A temperature of 310 K was maintained with a velocity-

287 rescaling thermostat (Bussi et al., 2007). Van der Waals interactions were calculated with the  
288 Lennard-Jones potential and a cutoff radius of 1.2 nm, with forces smoothly switched to zero in  
289 the range of 1.0–1.2 nm and no dispersion correction. The protein was described by the  
290 CHARMM36m (Huang et al., 2017) force field, lipids by the CHARMM36 force field (Klauda et  
291 al., 2010), and water by the TIP3P model (Jorgensen et al., 1983).

292 Na<sup>+</sup> and Cl<sup>-</sup> were added to give a bulk concentration of approximately 50 mM NaCl. Three  
293 diclofenac molecules were added per system and fitted onto AF-219 of aligned 5SVQ. 7  
294 independent systems each of the wildtype P2X3 apo-closed state and L191A apo-closed state  
295 were simulated for more than 200 ns each, and were preceded by equilibration for about 200 ns:  
296 first with restraints on all heavy atoms and lipids in the z-direction, second on all heavy atoms,  
297 and third on backbone atoms only. All trajectories that showed a stable binding of diclofenac  
298 were selected and clustered with GROMACS tool gmx clusterm and gromos algorithm. Cut-off  
299 for RMSD differences in a cluster was set to 0.3 nm.

300 Initial force-field parameters for diclofenac were generated according to the CHARMM  
301 generalized force-field (CGenFF) (Vanommeslaeghe et al., 2010, Vanommeslaeghe and  
302 MacKerell, 2012, Vanommeslaeghe et al., 2012, Yu et al., 2012), using the CHARMM-GUI  
303 webserver (<https://charmm-gui.org/>). The initial molecular geometry and charge assignments  
304 were further optimized with the force-field toolkit (ffTK) (Mayne et al., 2013) version 2.1 plugin  
305 for the visual molecular dynamics (VMD) version 1.9.4a57 analysis suite (Humphrey et al.,  
306 1996). The ffTK program provides a workflow of quantum-mechanical calculations using ORCA  
307 (Neese et al., 2020) 5.0.3, followed by Newtonian optimizations using the nanoscale molecular  
308 dynamics (NAMD) (Phillips et al., 2020) engine. An initial parameter file is generated in ffTK by  
309 analogy using the protein structure file (psf) and protein coordinate file generated by CHARMM-  
310 GUI. The initial molecular geometry was optimized with ORCA at the MP2/6-31G\* level of  
311 theory. After the geometry-optimization had converged, atomic partial charges were  
312 approximated with ORCA by calculating water-interaction energies at the HF/6-31G\* level of  
313 theory. Aliphatic and aromatic hydrogens were assigned partial charges of 0.09 and 0.115  
314 respectively – only hydroxyl hydrogens were optimized. To account for the positive charge  
315 associated with the dipole created by halogens known as alpha-holes, a lone-pair particle (LP)  
316 was added automatically via CHARMM-GUI (Pang et al., 2020). New bonded parameters for  
317 diclofenac only contained two dihedral terms that, which are consistent with the CHARMM36-  
318 ForceField, were used for diclofenac simulations – dihedral bonds were not further optimized due  
319 to accordance with having a bond energy-penalty of less than 50 (unitless penalties as provided by  
320 the CGenFF program). Detailed instructions for using the most updated ffTK with support for the  
321 open-source quantum chemistry package, ORCA, can be found at the ffTK website  
322 (<https://www.ks.uiuc.edu/Research/vmd/plugins/fftk>), and the updated tutorial  
323 (<https://www.ks.uiuc.edu/~mariano/fftk-tutorial.pdf>).

324

325



## 326 3 Results

### 327 3.1 Validation of the inhibitory effect of various NSAIDs on P2X3R-mediated currents

328 In a previous screening of 2000 approved drugs, natural products and bioactive substances,  
329 various NSAIDs were found to inhibit S15V-rP2X3R-mediated currents (Obrecht et al., 2019).  
330 These included diclofenac, flunixin meglumine, meclofenamic acid and niflumic acid, where  
331 diclofenac showed the greatest inhibitory effect (> 80 % inhibition) of the screened NSAIDs  
332 (Obrecht et al., 2019). To validate the screening results, we characterised the potency of  
333 diclofenac, flunixin and meclofenamic acid using TEVC on *Xenopus laevis* oocytes  
334 heterologously expressing S<sup>15</sup>V-rP2X3R and His-S<sup>15</sup>V-hP2X3R. Instead of niflumic acid, we  
335 decided to investigate the structurally related flufenamic acid (FFA) due to its additional use in  
336 research as a nonselective ion channel blocker (Guinamard et al., 2013). Furthermore, we  
337 included the NSAIDs ibuprofen and naproxen in our investigations, because these are used  
338 extensively in daily practice. The structural formulas of the NSAIDs investigated are shown in  
339 Figure 1 (Fig. 1, compounds 1-6).

340 A peak current protocol including a 30 s preincubation of the antagonist was applied (Suppl. Fig.  
341 1) to determine the inhibitory effect of the NSAIDs at the P2X3Rs. The current amplitude in  
342 presence of the antagonist was compared to the preceding control current in absence of the  
343 antagonist. The inhibitory effect of diclofenac, FFA and flunixin was not reversible by the  
344 following washout, which was reflected in a reduced amplitude of the subsequent control current  
345 that could not be explained by the run down alone (c.f. Fig. 2 A). Due to this potentially  
346 irreversible inhibitory effect, the subsequent amplitude in absence of the antagonist did not  
347 provide a suitable reference and was not taken into account to calculate the control current.

348 All investigated NSAIDs were less effective at the rat P2X3R than at the human P2X3R (Fig. 2  
349 A, B) or even had no effect at all on rat P2X3R, thus we decided to focus our further  
350 investigations on human P2X receptors. Concentration-response analysis revealed that ATP-  
351 evoked hP2X3R-mediated responses were inhibited by various NSAIDs. Diclofenac proved to be  
352 the most effective antagonist with an IC<sub>50</sub> value of 138.2 μM (95% CI: 46.0 - 415.1 μM; Fig. 2 C)  
353 and a maximum inhibition of ~ 80% at a concentration of 1mM (Tbl. 1). FFA proved to inhibit  
354 hP2X3R-mediated currents with a lower potency (IC<sub>50</sub> value of 208.8 μM; 95% CI: 94.8 - 459.9  
355 μM; Tbl. 1) in comparison to diclofenac. Flunixin, which is mainly used in veterinary medicine,  
356 had a greater potency for the hP2X3 receptor than FFA and diclofenac (IC<sub>50</sub> value of 32.4 μM;  
357 95% CI: 11.6 - 90.2 μM; Tbl. 1), but a maximum inhibition of only 53% at a concentration of  
358 1mM was observed, indicating a lower efficacy of flunixin. By contrast, only a weak inhibition of  
359 hP2X3R was observed for ibuprofen, meclofenamic acid and naproxen. The current amplitude in  
360 presence of 100 μM meclofenamic acid, naproxen or ibuprofen was reduced by a maximum of  
361 15-18% suggesting an estimated IC<sub>50</sub> value of > 300 μM (Tbl. 1). Due to their low inhibitory  
362 potency (ibuprofen, meclofenamic acid and naproxen) or low efficacy (flunixin) (c.f. Tbl. 1) these  
363 were not investigated further. Thus, only diclofenac - being the most effective antagonist - and  
364 FFA due to its additional use in research as a nonselective ion channel blocker (Guinamard et al.,  
365 2013) were further analyzed.

### 366 3.2 Characterisation of the potency and selectivity of diclofenac at P2X receptors by 367 TEVC

368 Selectivity profiling of diclofenac was performed at the hP2X1R, hP2X2/3R, hP2X2R, hP2X4R  
369 and hP2X7R (Fig. 3 B). To analyze the heteromeric hP2X2/3R the ATP derivative α,β-meATP was  
370 used (Fig. 3 A) to evoke hP2X2/3R-mediated currents, because it does not activate the  
371 homotrimeric hP2X2R. Currents mediated by the homotrimeric hP2X3R can be neglected due to  
372 its strong desensitization and run down, when α,β-meATP is applied repetitively in short intervals

373 (Bianchi et al., 1999, North, 2002). The desensitization kinetics of the heterotrimeric hP2X2/3  
374 receptor resemble those of the homotrimeric hP2X2 receptor, therefore the steady-state protocol  
375 was used (Fig. 3 A) (North, 2002). Diclofenac antagonized the heteromeric P2X2/3R with the  
376 highest potency of 76.7  $\mu$ M (95% CI: 64.6 - 91.2  $\mu$ M) and showed the following rank order of its  
377 potencies at P2XR subtypes: hP2X2/3R > hP2X3R > hP2X1R > hP2X4R. All IC<sub>50</sub> values are  
378 summarized in table 2 (Tbl. 2). By contrast, at the hP2X2R diclofenac did not antagonize ATP-  
379 evoked P2X2R-mediated responses, but presence of 1 mM of diclofenac exhibited a 1.7-fold  
380 increase of the P2X2R responses and thus showed a potentiating effect at the P2X2R (Suppl. Fig.  
381 3 A).

382 In summary, diclofenac was shown to be more potent at hP2X2/3R (IC<sub>50</sub> 76.7  $\mu$ M; 95% CI: 64.6 -  
383 91.2  $\mu$ M) than at hP2X3R (IC<sub>50</sub> 138.2  $\mu$ M; 95% CI: 46.0 - 415.1  $\mu$ M). However, it should be  
384 noted that the use of the different agonists ( $\alpha,\beta$ -meATP hP2X2/3R; ATP hP2X3R) complicates  
385 the assessment of a quantitative comparative analysis.

386 To assess the effect of diclofenac on the non-desensitizing hP2X7R a modified steady-state  
387 protocol was used. For recordings of the P2X7R, most scientists use divalent free solutions such  
388 as ORi- supplemented with 100  $\mu$ M flufenamic acid (FFA) as an unselective ion channel blocker  
389 to inhibit nonspecific chloride conductance in the absence of divalent ions (Hülsmann et al., 2003,  
390 Weber et al., 1995). However, since FFA is one of the investigated NSAIDs, this supplement did  
391 not seem to be reasonable. Therefore, the composition of the ORi- solution was modified as  
392 follows: 100 mM NaCl, 2.5 mM KCl, 1 mM MgCl<sub>2</sub>, 5 mM HEPES, pH 7.4 and according to  
393 former protocols (Klapperstück et al., 2000) an free ATP<sup>4-</sup> concentraion of 300  $\mu$ M was adjusted.  
394 300 $\mu$ M of diclofenac reduced the ATP<sup>4-</sup>-induced current amplitude by approximately 33%  
395 (Suppl. Fig. 4), which suggested an estimated IC<sub>50</sub> value of > 300  $\mu$ M for diclofenac at the  
396 hP2X7R. Since such high concentrations of diclofenac are clinically irrelevant, we refrained from  
397 performing a concentration-response analysis.

### 398 3.3 Mechanism of action of diclofenac

399 Although the S<sup>15</sup>V mutant of P2X3R desensitizes slowly (Hausmann et al., 2014), the  
400 desensitization may still prevent reliable assessment of the mechanism of antagonism (Hausmann  
401 et al., 2014). Thus, the non-desensitizing heteromeric hP2X2/3R was used assess the mechanism  
402 of action of diclofenac, which was also inhibited by diclofenac with the highest potency. To this  
403 end, the extent of inhibition of the heteromeric hP2X2/3R by 30  $\mu$ M diclofenac was determined  
404 using  $\alpha,\beta$ -meATP concentrations of 1  $\mu$ M or 30  $\mu$ M as an agonist. We refrained from determining  
405 full agonist concentration-response curves at the hP2X2/3R, because simultaneous activation of  
406 homomeric hP2X2R occurs when hP2X2 and hP2X3 subunits are co-expressed and agonist  
407 concentration exceeds 30  $\mu$ M  $\alpha,\beta$ -meATP. 30  $\mu$ M diclofenac inhibited the 1  $\mu$ M or 30  $\mu$ M  $\alpha,\beta$ -  
408 meATP-induced current responses of the heteromeric hP2X2/3R by 44.8  $\pm$  21.9 % or 25.1  $\pm$  10.1  
409 %, respectively (Fig. 4 A). Thus, inhibition by 30  $\mu$ M diclofenac could be overcome by  
410 increasing concentrations of the agonist  $\alpha,\beta$ -meATP, indicating competition of diclofenac and  
411  $\alpha,\beta$ -meATP at the hP2X2/3R.

412 To further support the competitive nature of the inhibition and to exclude the possibility that  
413 diclofenac does bind in the negative allosteric site of hP2X3R as do other modulators (or negative  
414 allosteric antagonists) such as gefapixant (formerly AF-219) (Wang et al., 2018) or ATA (Obrecht  
415 et al., 2019), we examined mutations of amino acid residues in the alloSite with respect to the  
416 effect of diclofenac. We have analyzed the L<sup>191</sup>F, N<sup>190</sup>A and the G<sup>189</sup>R mutants (in the  
417 background of the S<sup>15</sup>V-hP2X3R (Obrecht et al., 2019)) of the negative allosteric binding site  
418 described in previous studies (Obrecht et al., 2019, Wang et al., 2018). These were inhibited by  
419 100  $\mu$ M diclofenac to a similar extent than the S<sup>15</sup>V-hP2X3R, suggesting that the negative  
420 allosteric site of hP2X3R is not the binding site of diclofenac. Furthermore, in contrast to the

421 findings for negative allosteric antagonists gefapixant/AF-219 (Wang et al., 2018) or ATA  
422 (Obrecht et al., 2019) the L<sup>191</sup>A/S<sup>15</sup>V-hP2X3R mutant was inhibited to a marked greater extent by  
423 diclofenac compared to the S<sup>15</sup>V-hP2X3R (Fig. 4 B). The competitive nature of the diclofenac  
424 inhibition as well as FFA inhibition of the L<sup>191</sup>A/S<sup>15</sup>V-hP2X3R mutant can be derived from  
425 Suppl. Fig. 6, which illustrates representative original current traces of the L<sup>191</sup>A/S<sup>15</sup>V-hP2X3R  
426 showing the effects of 10  $\mu$ M diclofenac or 30  $\mu$ M FFA on ATP-induced currents: the initial  
427 inhibition by diclofenac or FFA at the beginning of the co-application could be overcome by  
428 prolonged ATP co-application, indicating competitive binding of ATP and the antagonist to the  
429 ATP-binding site.

430 To investigate the binding mode of diclofenac and to shed light on a possible inhibition  
431 mechanism, we performed extensive all-atom molecular dynamics simulations of hP2X3R (Fig. 5  
432 A) embedded in a lipid bilayer and surrounded by a physiological NaCl-based solution. Since the  
433 L<sup>191</sup>A mutation appears to facilitate diclofenac binding in our experiments, we initially assumed  
434 that diclofenac interacts with the receptor at a similar site like the allosteric inhibitor AF-219  
435 (Wang et al., 2018), although L<sup>191</sup>A was shown to reduce binding of this compound. Therefore,  
436 we placed diclofenac molecules at the position of AF-219 (Wang et al., 2018) and investigated  
437 how diclofenac reorients in equilibrium simulations over hundreds of nanoseconds.

438 In seven independent simulation replicas, we consistently observed diclofenac to alternately  
439 form salt-bridge interactions between its carboxyl group and residues K<sup>65</sup>, K<sup>63</sup>, and K<sup>176</sup>.  
440 Furthermore, diclofenac binding was stabilized by a hydrogen bond with E<sup>270</sup> and interactions  
441 between one of diclofenac's chlorine atoms at K<sup>176</sup> and K<sup>201</sup> (Fig. 5 B, C). A similar diclofenac  
442 binding pose was observed in simulations of L<sup>191</sup>A-hP2X3R. We speculate that removal of the  
443 bulky hydrophobic sidechain of L<sup>191</sup> may facilitate diclofenac binding by creating an energetically  
444 more favorable environment (Fig 5 D). We then calculated the root-mean-squared fluctuations of  
445 the loop of the left flipper domain (residue stretch 265–277, hP2X3 numbering) and observed a  
446 reduction in flexibility upon diclofenac binding. Thus, it appears that diclofenac binding rigidifies  
447 this region and may thereby impair allosteric communication between the ATP binding site and  
448 the lower body and transmembrane domains (Fig. 5 E). Summarizing, our simulations resolved  
449 the binding pose of diclofenac, which is nearby but distinct from the binding pose of the allosteric  
450 inhibitor AF-219, and partially overlaps with ATP, suggesting a partially competitive inhibition  
451 mechanism (Fig. 5 F).

### 452 3.4 Effect of diclofenac at native P2XRs in DRG neurons

453 To examine whether diclofenac is capable of inhibiting native P2X3-subunit containing receptors  
454 of nociceptive neurons with similar potency as oocyte-expressed recombinant hP2X2/3Rs and  
455 P2X3Rs, DRG neurons of pigs (3 - 4 month old) were analyzed. Currents elicited by 10  $\mu$ M  $\alpha,\beta$ -  
456 meATP were found in medium sized (~ 35 - 60  $\mu$ m diameter) porcine DRG neurons. 10  $\mu$ M  $\alpha,\beta$ -  
457 meATP was applied repeatedly every 3 min for 3 s duration onto cultured porcine DRG neurons  
458 (Fig. 6 A, B). Whole cell currents elicited by  $\alpha,\beta$ -meATP appeared as a slower activating and  
459 non-desensitizing phenotype mediated by heteromeric P2X2/3Rs. These were inhibited by 100  
460  $\mu$ M diclofenac (pre-equilibrated for 20 s) by  $70.5 \pm 35.8$  % (n = 11) (Fig. 6 C). Thus, diclofenac  
461 inhibited native pig P2X2/3Rs expressed in medium sized DRG neurons to a similar extent than  
462 hP2X2/3Rs heterologously expressed in *X. laevis* oocytes (c.f. Fig. 3).

### 463 3.5 Characterisation of the potency and selectivity of FFA at selected P2X receptors

464 Due to its common use in research as a nonselective ion channel blocker (Guinamard et al., 2013),  
465 FFA was further characterized at selected P2XRs.

466 Concentration-response analysis revealed a concentration-dependent inhibition of hP2X3R- and  
467 rP2X3R-mediated currents by micromolar concentrations of FFA. IC<sub>50</sub> values of 221.7 μM (95%  
468 CI: 98.9 - 497 μM) and 264.1 μM (95% CI: 56.9 – 612 μM) were determined at the hP2X3R and  
469 rP2X3R, respectively (Fig. 7 A). Thus, FFA with an IC<sub>50</sub> value of 221.7 μM was less potent than  
470 diclofenac in hP2X3R inhibition. In contrast to diclofenac, FFA did inhibit rP2X3R-mediated  
471 currents, although it was more potent at the hP2X3R than at rP2X3R (IC<sub>50</sub> value of 221.7 μM and  
472 264,1 μM, respectively). This indicates a weaker selectivity of FFA towards the human P2X3R in  
473 comparison to diclofenac. Importantly, a concentration of 100 μM FFA, which is commonly used  
474 in research to avoid bias resulting from the activation of various other ion channels, exerted a  
475 relevant inhibitory effect of 30 % on hP2X3R and 25 % on rP2X3R (Fig. 7 A).

476 In case of FFA, selectivity profiling was performed at hP2X2R and hP2X7R. These two subtypes  
477 were chosen, because these either were potentiated or are often analyzed in presence of FFA,  
478 respectively. When ATP and FFA were coapplied at the hP2X2R, the current amplitude increased  
479 up to 8-fold compared to the steady state current in absence of FFA (Fig. 7 B). Thus, in  
480 comparison to diclofenac, FFA shows a significantly higher potentiating effect on hP2X2Rs. The  
481 effect of FFA on hP2X7R-mediated currents was assessed by applying concentrations of 100, 300  
482 and 1000μM. A concentration of 100μM, which is commonly used in research applications as a  
483 supplement to divalent free ORi- for recordings of the P2X7R, exerted a relevant inhibitory effect  
484 of ~ 39 % (Suppl. Fig. 5). A rough assessment of the IC<sub>50</sub> value using the three tested  
485 concentrations suggested a value of approximately 900 μM for hP2X7R inhibition. These results  
486 demonstrate that the use of 100 μM FFA in the analysis of hP2X2R, hP2X3R, and hP2X7  
487 receptors must be critically evaluated, because FFA significantly modulates receptor function,  
488 which may result in a significant bias if receptor function is to be quantified.

489

## 490 4 Discussion

### 491 4.1 Inhibition of hP2X3R-mediated currents as an additional mode of action of NSAIDs

492 Our findings demonstrate the inhibition of the human P2X3R by various NSAIDs. Diclofenac  
493 proved to be the most effective antagonist with an IC<sub>50</sub> value of 138.2 μM. Among the  
494 investigated NSAIDs, diclofenac, FFA and flunixin exerted an enduring, potentially irreversible  
495 inhibitory effect on the current amplitude, which could not be eliminated by the following  
496 washout period.

497 Considering the involvement of hP2X3R in nociception, it is conceivable that inhibition of  
498 hP2X3R contributes to the analgesic effect of NSAIDs and represents an additional mode of  
499 action besides COX inhibition. However, plasma levels and IC<sub>50</sub> values must be taken into  
500 consideration. In case of diclofenac, low nanomolar plasma levels are reached during transdermal  
501 application, whereas 10-20-fold higher concentrations can be observed in synovial tissue (Efe et  
502 al., 2014). When injected intramuscularly, significantly higher plasma levels of approximately 1.8  
503 μg/ml (~ 6 μM) can be achieved (Drago et al., 2017). Similarly, maximum plasma levels of  
504 approximately 2.3 - 2.6 μg/ml (~ 7 - 8 μM) can be achieved with oral application of 50 - 75 mg  
505 diclofenac (Kienzler et al., 2010, Kurowski et al., 1994). According to our experimental data, the  
506 current amplitude of the hP2X2/3R and hP2X3R were reduced by approximately 20-30% in  
507 presence of 3-10 μM diclofenac. Therefore, it can be assumed that clinically relevant  
508 concentrations of diclofenac exert a significant inhibitory effect on hP2X3R-mediated currents.  
509 However, diclofenac shows a manyfold higher potency at COX1 (IC<sub>50</sub> value of 0.075 μM) and  
510 COX2 (IC<sub>50</sub> value of 0.038 μM) than at hP2X3R (IC<sub>50</sub> value of 138.2 μM) (Warner et al., 1999).  
511 The effect of diclofenac besides COX-inhibition has also been studied by other groups, such as  
512 (Gan, 2010). For instance, in addition to COX inhibition, other effects such as inhibition of acid-  
513 sensing ion channels (ASICs) were discovered (Voilley et al., 2001). However, inhibition of  
514 P2X3R has not yet been described before.

515 Similar to our findings for diclofenac, Hautaniemi et al. described the inhibition of P2X3R by the  
516 NSAID naproxen (Hautaniemi et al., 2012). According to our TEVC data, high micromolar to  
517 low millimolar concentrations of naproxen are necessary to inhibit hP2X3R, indicating a low  
518 potency of naproxen. These results are consistent with the results that Hautaniemi et al. obtained  
519 from calcium imaging of rat trigeminal neurons (Hautaniemi et al., 2012). Despite its lower  
520 potency in comparison to diclofenac, naproxen might as well exert a relevant inhibitory effect due  
521 to higher plasma levels. When administered orally, maximum plasma levels of approximately 70 -  
522 80 μg/ml (~ 300 - 350 μM) are reached after about two hours (Desager et al., 1976, Dresse et al.,  
523 1978).

### 524 4.2 Selectivity profiling of diclofenac at P2X receptors and related side effects

525 Selectivity profiling of diclofenac at the different P2XR subtypes showed a strong inhibition of  
526 hP2X3R and hP2X2/3R and a weaker inhibition of hP2X1R, hP2X4R and hP2X7R. The rank  
527 order of its potencies is: hP2X2/3R > hP2X3R > hP2X1R > hP2X4R, hP2X7R.

528 Diclofenac had a similar maximum inhibitory effect on hP2X1R as on hP2X3R, but a lower  
529 potency. In contrast to its potentially irreversible effect on hP2X3R, diclofenac seemed to exert a  
530 reversible inhibitory effect on hP2X1R. Inhibition of hP2X1R, which is involved in inflammatory  
531 responses (Lecut et al., 2009), might contribute to the anti-inflammatory effect of diclofenac.  
532 However, the difference in potency between hP2X1R (IC<sub>50</sub> 337.8 μM) and COX (IC<sub>50</sub> value of  
533 0.075 μM or 0.038 μM of COX1 or COX2, respectively) should be kept in mind.

534 Considering its low potency at hP2X4R and hP2X7R, it is unlikely that inhibition of these P2X  
535 subtypes, which are involved in nociception (Chessell et al., 2005, Tsuda et al., 2009), contributes  
536 to the analgesic effect of diclofenac.

537 Remarkably, diclofenac had a weak potentiating effect on hP2X2R-mediated currents. Regarding  
538 its strong inhibitory effect on hP2X3R and its weak potentiating effect on hP2X2R, a  
539 predominantly inhibitory effect on the heterotrimeric hP2X2/3 receptor could have been expected.  
540 Surprisingly, diclofenac even seemed to be more potent at hP2X2/3R (IC<sub>50</sub> 76.7 μM) than at  
541 hP2X3R (IC<sub>50</sub> 138.2 μM). However, it should be kept in mind that the use of the correction factor  
542 in hP2X3R measurements and the use of different agonists at hP2X2/3 and hP2X3R implies a  
543 bias that may affect an accurate, direct quantitative comparison. Since the run down varies  
544 between different recordings, the inhibitory effect of diclofenac on hP2X3R might be  
545 underestimated.

546 It is presumed that taste disorders, which have been observed in clinical trials of newly developed  
547 P2X3R antagonists, mainly result from the inhibition of heterotrimeric P2X2/3R (Garceau and  
548 Chauret, 2019, McGarvey et al., 2022). Therefore, the question arises whether diclofenac might  
549 cause taste disorders due to its inhibitory effect on hP2X2/3R. While taste disorders as a side  
550 effect are listed as "very rare" in the prescribing information, more than 110 suspected cases of  
551 ageusia, dysgeusia or taste disorders have been reported in the European Union so far in  
552 EudraVigilance (up to 28/11/2022) for diclofenac (<http://www.adrreports.eu/de/>). It must also be  
553 assumed that there is a high number of unreported cases. In a prospective, randomized clinical  
554 trial regarding postoperative administration of Diclofenac, 58% of patients reported impaired taste  
555 sensation (Attri et al., 2015). Therefore, it seems likely that diclofenac affects taste sensation due  
556 to the inhibition of hP2X2/3R.

#### 557 **4.3 Mechanism of action of diclofenac at P2X3R and functional implications for gating**

558 We have found the following lines of experimental evidence for a competitive inhibition of  
559 P2X3-subunit containing receptors by diclofenac: (i) inhibition by 30 μM diclofenac of the  
560 hP2X2/3R could be overcome by increasing concentrations of the agonist α,β-meATP; (ii) at the  
561 L<sup>191</sup>A/S<sup>15</sup>V-hP2X3R the inhibition by diclofenac or FFA at the beginning of the co-application  
562 with ATP could be overcome by prolonged ATP co-application; (iii) the L<sup>191</sup>F, N<sup>190</sup>A and the  
563 G<sup>189</sup>R mutants of the negative allosteric binding site (Obrecht et al., 2019, Wang et al., 2018),  
564 which markedly affected the extent of inhibition of the hP2X3R by the allosteric antagonists  
565 gefapixant/AF-219 or ATA were inhibited by 100 μM diclofenac to a similar extent than the  
566 hP2X3R.

567 In addition, our extensive all atom molecular dynamics simulation studies have determined that  
568 the most common binding pose of diclofenac at the hP2X3R largely overlaps with ATP bound to  
569 the open-state conformation of the hP2X3R. Furthermore, we show by RMSF analysis that  
570 diclofenac when bound to the hP2X3R restricts the conformational flexibility of the left flipper  
571 and dorsal fin domains, crucially implicated in ATP-induced gating of the hP2X3R (Mansoor,  
572 2022, Mansoor et al., 2016). Our molecular dynamics simulation results also provide a  
573 mechanistic explanation for the inhibition of the ATP-induced gating of the hP2X3R: the strong  
574 interactions of diclofenac with the residues K201 and E270 of the dorsal fin and left flipper  
575 domains, respectively, prevent the conformational rearrangements of dorsal fin and left flipper  
576 domains. These are otherwise essential for channel gating or mechanistically, for the transmission  
577 of ATP binding to the conformational rearrangement of the lower body domain and eventually  
578 opening of the ion channel pore. Thus, our results show that diclofenac acts via a similar  
579 mechanism of action than TNP-ATP (Mansoor et al., 2016).

#### 580 **4.4 Selectivity profiling of FFA at P2XRs questions its use in P2XR assays**

581 FFA proved to inhibit human P2X3R-mediated currents with a lower potency (IC<sub>50</sub> value of 221.7  
582 μM) than diclofenac (IC<sub>50</sub> 138.2μM). In contrast to diclofenac, FFA did inhibit rat P2X3R-  
583 mediated currents (IC<sub>50</sub> value of 264,1μM), indicating a weaker selectivity of FFA towards the  
584 human P2X3R. As FFA is usually applied transdermally, plasma levels do not exceed 180 nM  
585 even with repetitive application (Drago et al., 2017). Due to its low potency at the hP2X3R and its  
586 low plasma levels, it must be assumed that P2X3R inhibition does not contribute to the analgesic  
587 effect of FFA in a relevant manner.

588 However, the inhibitory effect of FFA on P2X3R could be of importance for other scientist that  
589 perform functional recordings of P2XRs with solutions supplemented with FFA. Being a non-  
590 selective ion channel blocker, FFA is widely used in research to avoid bias resulting from the  
591 activation of various other ion channels (Guinamard et al., 2013). Our findings demonstrate that a  
592 commonly used concentration of 100 μM FFA exerts a relevant inhibitory effect of approximately  
593 30% on hP2X3R and 25% on rP2X3R. However, especially for recordings of the P2X7R, FFA is  
594 often used as a supplement to divalent free ORi- solution (Hülsmann et al., 2003). While  
595 inhibition of the P2X3R by FFA has not yet been described by other groups, there are  
596 contradictory results regarding its effect on P2X7R. Suadicani et al. suggested a competitive  
597 antagonism of FFA at P2X7R (Suadicani et al., 2006), whereas Ma et al. did not find an inhibitory  
598 effect of FFA on P2X7R, but rather an inhibition of pannexin-1 by FFA (Ma et al., 2009).  
599 According to our data, hP2X7R-mediated currents are reduced by approximately 40% in presence  
600 of 100 μM FFA. Even when FFA is no longer applied, the permeability of the receptor remains  
601 affected as shown in Suppl. Fig. 5 (Suppl. Fig. 5) by comparing the slope of the linearly  
602 increasing current before and after FFA application, which may indicate a potentially irreversible  
603 effect of FFA on hP2X7R-mediated current responses.

604 Taken together, our results question the use of FFA as a nonselective ion channel blocker when  
605 P2XR-mediated currents are to be measured.

606 In comparison to diclofenac, FFA shows a significantly higher potentiating effect on hP2X2R  
607 with a 7-8-fold increase in current amplitudes. This potentiating effect of FFA on hP2X2R has  
608 already been described by other groups (Schmidt et al., 2018). However, Schmidt et al. do not  
609 attribute this effect to a direct interaction of FFA with the receptor, but to membrane alterations  
610 caused by the amphiphilic FFA (Schmidt et al., 2018). However, from our point of view, this  
611 theory seems questionable, since it cannot explain the opposing effect of FFA on hP2X2R and  
612 hP2X3R.

## 613 5 Conclusion/Summary

614 In a previous screening of 2000 approved drugs, natural products and bioactive substances,  
615 various NSAIDs were found to inhibit S15V-rP2X3R-mediated currents (Obrecht et al., 2019).  
616 Using TEVC, we identified diclofenac as a hP2X3R and hP2X2/3R antagonist with micromolar  
617 potency (with IC<sub>50</sub> values of 138.2μM and 76.72μM, respectively), which also showed to be  
618 effective in antagonizing native P2X2/3R-mediated responses in pig DRG neurons. Considering  
619 their involvement in nociception, inhibition of hP2X3R and hP2X2/3R by micromolar  
620 concentrations of diclofenac may contribute to the analgesic effect of diclofenac and represent an  
621 additional -although less potent-mode of action besides the well-known COX inhibition. Our  
622 results strongly support a competitive antagonism through which diclofenac, by interacting with  
623 residues of the ATP-binding site, left flipper, and dorsal fin domains inhibits gating of P2X3R by  
624 conformational fixation of the left flipper and dorsal fin domains. A less potent inhibition of  
625 hP2X3R was observed for all other investigated NSAIDs. FFA proved to inhibit hP2X3R,  
626 rP2X3R and hP2X7R, questioning its use as a non-selective ion channel blocker, when P2XR-  
627 mediated responses are under study.

## 628 **References**

- 629 Abdulqawi, R., Dockry, R., Holt, K., Layton, G., Mccarthy, B. G., Ford, A. P., et al. (2015).  
630 P2X3 receptor antagonist (AF-219) in refractory chronic cough: a randomised, double-blind,  
631 placebo-controlled phase 2 study. *Lancet*, 385, 1198-205. doi: 10.1016/S0140-6736(14)61255-1  
632 Abraham, M. J., Murtola, T., Schulz, R., Páll, S., Smith, J. C., Hess, B., et al. (2015).  
633 GROMACS: High performance molecular simulations through multi-level parallelism from  
634 laptops to supercomputers. *SoftwareX*, 1-2, 19-25. doi:  
635 <https://doi.org/10.1016/j.softx.2015.06.001>  
636 Attri, J. P., Sandhu, G. K., Khichy, S., Singh, H., Singh, K. & Sharan, R. (2015). Comparative  
637 evaluation of oral flupirtine and oral diclofenac sodium for analgesia and adverse effects in  
638 elective abdominal surgeries. *Anesth Essays Res*, 9, 72-8. doi: 10.4103/0259-1162.150681  
639 Berendsen, H. J. C., Postma, J. P. M., Van Gunsteren, W. F., Dinola, A. & Haak, J. R. (1984).  
640 Molecular dynamics with coupling to an external bath. *The Journal of Chemical Physics*, 81,  
641 3684-3690. doi: 10.1063/1.448118  
642 Bianchi, B. R., Lynch, K. J., Touma, E., Niforatos, W., Burgard, E. C., Alexander, K. M., et al.  
643 (1999). Pharmacological characterization of recombinant human and rat P2X receptor subtypes.  
644 *Eur J Pharmacol*, 376, 127-38. doi: 10.1016/s0014-2999(99)00350-7  
645 Burnstock, G. (2016). Purinergic Mechanisms and Pain. *Adv Pharmacol*, 75, 91-137. doi:  
646 10.1016/bs.apha.2015.09.001  
647 Bussi, G., Donadio, D. & Parrinello, M. (2007). Canonical sampling through velocity  
648 rescaling. *J Chem Phys*, 126, 014101. doi: 10.1063/1.2408420  
649 Chen, C. C., Akopian, A. N., Sivilotti, L., Colquhoun, D., Burnstock, G. & Wood, J. N. (1995).  
650 A P2X purinoceptor expressed by a subset of sensory neurons. *Nature*, 377, 428-31. doi:  
651 10.1038/377428a0  
652 Chessell, I. P., Hatcher, J. P., Bountra, C., Michel, A. D., Hughes, J. P., Green, P., et al. (2005).  
653 Disruption of the P2X7 purinoceptor gene abolishes chronic inflammatory and neuropathic pain.  
654 *Pain*, 114, 386-96. doi: 10.1016/j.pain.2005.01.002  
655 Cockayne, D. A., Dunn, P. M., Zhong, Y., Rong, W., Hamilton, S. G., Knight, G. E., et al.  
656 (2005). P2X2 knockout mice and P2X2/P2X3 double knockout mice reveal a role for the P2X2  
657 receptor subunit in mediating multiple sensory effects of ATP. *J Physiol*, 567, 621-39. doi:  
658 10.1113/jphysiol.2005.088435  
659 Cockayne, D. A., Hamilton, S. G., Zhu, Q. M., Dunn, P. M., Zhong, Y., Novakovic, S., et al.  
660 (2000). Urinary bladder hyporeflexia and reduced pain-related behaviour in P2X3-deficient mice.  
661 *Nature*, 407, 1011-5. doi: 10.1038/35039519  
662 Desager, J. P., Vanderbist, M. & Harvengt, C. (1976). Naproxen plasma levels in volunteers  
663 after single-dose administration by oral and rectal routes. *J Clin Pharmacol*, 16, 189-93. doi:  
664 10.1002/j.1552-4604.1976.tb01516.x  
665 Dewitt, D. L., El-Harith, E. A., Kraemer, S. A., Andrews, M. J., Yao, E. F., Armstrong, R. L.,  
666 et al. (1990). The aspirin and heme-binding sites of ovine and murine prostaglandin endoperoxide  
667 synthases. *J Biol Chem*, 265, 5192-8.  
668 Drago, S., Imboden, R., Schlatter, P., Buylaert, M., Krahenbuhl, S. & Drewe, J. (2017).  
669 Pharmacokinetics of Transdermal Etofenamate and Diclofenac in Healthy Volunteers. *Basic &*  
670 *Clinical Pharmacology & Toxicology*, 121, 423-429. doi: 10.1111/bcpt.12818  
671 Dresse, A., Gerard, M. A., Quinaux, N., Fischer, P. & Gerardy, J. (1978). Effect of diflunisal  
672 on the human plasma levels and on the urinary excretion of naproxen. *Arch Int Pharmacodyn*  
673 *Ther*, 236, 276-84.  
674 Efe, T., Sagnak, E., Roessler, P. P., Getgood, A., Patzer, T., Fuchs-Winkelmann, S., et al.  
675 (2014). Penetration of topical diclofenac sodium 4 % spray gel into the synovial tissue and  
676 synovial fluid of the knee: a randomised clinical trial. *Knee Surg Sports Traumatol Arthrosc*, 22,  
677 345-50. doi: 10.1007/s00167-013-2408-0



- 678 Fiser, A. & Sali, A. (2003). Modeller: generation and refinement of homology-based protein  
679 structure models. *Methods Enzymol*, 374, 461-91. doi: 10.1016/S0076-6879(03)74020-8
- 680 Gan, T. J. (2010). Diclofenac: an update on its mechanism of action and safety profile. *Curr*  
681 *Med Res Opin*, 26, 1715-31. doi: 10.1185/03007995.2010.486301
- 682 Garceau, D. & Chauret, N. (2019). BLU-5937: A selective P2X3 antagonist with potent anti-  
683 tussive effect and no taste alteration. *Pulm Pharmacol Ther*, 56, 56-62. doi:  
684 10.1016/j.pupt.2019.03.007
- 685 Guinamard, R., Simard, C. & Del Negro, C. (2013). Flufenamic acid as an ion channel  
686 modulator. *Pharmacol Ther*, 138, 272-84. doi: 10.1016/j.pharmthera.2013.01.012
- 687 Hausmann, R., Bahrenberg, G., Kuhlmann, D., Schumacher, M., Braam, U., Bieler, D., et al.  
688 (2014). A hydrophobic residue in position 15 of the rP2X3 receptor slows desensitization and  
689 reveals properties beneficial for pharmacological analysis and high-throughput screening.  
690 *Neuropharmacology*, 79, 603-15. doi: 10.1016/j.neuropharm.2014.01.010
- 691 Hausmann, R., Rettinger, J., Gerevich, Z., Meis, S., Kassack, M. U., Illes, P., et al. (2006). The  
692 suramin analog 4,4',4",4'''-(carbonylbis(imino-5,1,3-benzenetriylbis (carbonylimino)))tetra-kis-  
693 benzenesulfonic acid (NF110) potently blocks P2X3 receptors: subtype selectivity is determined  
694 by location of sulfonic acid groups. *Mol Pharmacol*, 69, 2058-67. doi: 10.1124/mol.106.022665
- 695 Hautaniemi, T., Petrenko, N., Skorinkin, A. & Giniatullin, R. (2012). The inhibitory action of  
696 the antimigraine nonsteroidal anti-inflammatory drug naproxen on P2X3 receptor-mediated  
697 responses in rat trigeminal neurons. *Neuroscience*, 209, 32-8. doi:  
698 10.1016/j.neuroscience.2012.02.023
- 699 Huang, J., Rauscher, S., Nawrocki, G., Ran, T., Feig, M., De Groot, B. L., et al. (2017).  
700 CHARMM36m: an improved force field for folded and intrinsically disordered proteins. *Nat*  
701 *Methods*, 14, 71-73. doi: 10.1038/nmeth.4067
- 702 Hülsmann, M., Nickel, P., Kassack, M., Schmalzing, G., Lambrecht, G. & Markwardt, F.  
703 (2003). NF449, a novel picomolar potency antagonist at human P2X1 receptors. *Eur J Pharmacol*,  
704 470, 1-7. doi: 10.1016/s0014-2999(03)01761-8
- 705 Humphrey, W., Dalke, A. & Schulten, K. (1996). VMD: visual molecular dynamics. *J Mol*  
706 *Graph*, 14, 33-8, 27-8. doi: 10.1016/0263-7855(96)00018-5
- 707 Jarvis, M. F., Burgard, E. C., Mcgaraughty, S., Honore, P., Lynch, K., Brennan, T. J., et al.  
708 (2002). A-317491, a novel potent and selective non-nucleotide antagonist of P2X3 and P2X2/3  
709 receptors, reduces chronic inflammatory and neuropathic pain in the rat. *Proc Natl Acad Sci U S*  
710 *A*, 99, 17179-84. doi: 10.1073/pnas.252537299
- 711 Jorgensen, W. L., Chandrasekhar, J., Madura, J. D., Impey, R. W. & Klein, M. L. (1983).  
712 Comparison of simple potential functions for simulating liquid water. *The Journal of Chemical*  
713 *Physics*, 79, 926-935. doi: 10.1063/1.445869
- 714 Kawate, T., Michel, J. C., Birdsong, W. T. & Gouaux, E. (2009). Crystal structure of the ATP-  
715 gated P2X(4) ion channel in the closed state. *Nature*, 460, 592-8. doi: 10.1038/nature08198
- 716 Kienzler, J. L., Gold, M. & Nollevaux, F. (2010). Systemic bioavailability of topical diclofenac  
717 sodium gel 1% versus oral diclofenac sodium in healthy volunteers. *J Clin Pharmacol*, 50, 50-61.  
718 doi: 10.1177/0091270009336234
- 719 Klapperstück, M., Büttner, C., Böhm, T., Schmalzing, G. & Markwardt, F. (2000).  
720 Characteristics of P2X7 receptors from human B lymphocytes expressed in *Xenopus* oocytes.  
721 *Biochim Biophys Acta*, 1467, 444-56. doi: 10.1016/s0005-2736(00)00245-5
- 722 Klauda, J. B., Venable, R. M., Freites, J. A., O'connor, J. W., Tobias, D. J., Mondragon-  
723 Ramirez, C., et al. (2010). Update of the CHARMM all-atom additive force field for lipids:  
724 validation on six lipid types. *J Phys Chem B*, 114, 7830-43. doi: 10.1021/jp101759q
- 725 Klein, S., Gashaw, I., Baumann, S., Chang, X., Hummel, T., Thuss, U., et al. (2022). First-in-  
726 human study of eliapixant (BAY 1817080), a highly selective P2X3 receptor antagonist:  
727 Tolerability, safety and pharmacokinetics. *Br J Clin Pharmacol*, 88, 4552-4564. doi:  
728 10.1111/bcp.15358

- 729 Kurowski, M., Menninger, H. & Pauli, E. (1994). The efficacy and relative bioavailability of  
730 diclofenac resinate in rheumatoid arthritis patients. *Int J Clin Pharmacol Ther*, 32, 433-40.
- 731 Lecut, C., Frederix, K., Johnson, D. M., Deroanne, C., Thiry, M., Faccinetto, C., et al. (2009).  
732 P2X1 ion channels promote neutrophil chemotaxis through Rho kinase activation. *J Immunol*,  
733 183, 2801-9. doi: 10.4049/jimmunol.0804007
- 734 Ma, W., Hui, H., Pelegrin, P. & Surprenant, A. (2009). Pharmacological characterization of  
735 pannexin-1 currents expressed in mammalian cells. *J Pharmacol Exp Ther*, 328, 409-18. doi:  
736 10.1124/jpet.108.146365
- 737 Mansoor, S. E. (2022). How Structural Biology Has Directly Impacted Our Understanding of  
738 P2X Receptor Function and Gating. *Methods Mol Biol*, 2510, 1-29. doi: 10.1007/978-1-0716-  
739 2384-8\_1
- 740 Mansoor, S. E., Lu, W., Oosterheert, W., Shekhar, M., Tajkhorshid, E. & Gouaux, E. (2016).  
741 X-ray structures define human P2X(3) receptor gating cycle and antagonist action. *Nature*, 538,  
742 66-71. doi: 10.1038/nature19367
- 743 Markham, A. (2022). Gefapixant: First Approval. *Drugs*, 82, 691-695. doi: 10.1007/s40265-  
744 022-01700-8
- 745 Marucci, G., Dal Ben, D., Buccioni, M., Marti Navia, A., Spinaci, A., Volpini, R., et al.  
746 (2019). Update on novel purinergic P2X3 and P2X2/3 receptor antagonists and their potential  
747 therapeutic applications. *Expert Opin Ther Pat*, 29, 943-963. doi:  
748 10.1080/13543776.2019.1693542
- 749 Mayne, C. G., Saam, J., Schulten, K., Tajkhorshid, E. & Gumbart, J. C. (2013). Rapid  
750 parameterization of small molecules using the Force Field Toolkit. *J Comput Chem*, 34, 2757-70.  
751 doi: 10.1002/jcc.23422
- 752 Mcgarvey, L. P., Birring, S. S., Morice, A. H., Dicipinigaitis, P. V., Pavord, I. D., Schelfhout,  
753 J., et al. (2022). Efficacy and safety of gefapixant, a P2X(3) receptor antagonist, in refractory  
754 chronic cough and unexplained chronic cough (COUGH-1 and COUGH-2): results from two  
755 double-blind, randomised, parallel-group, placebo-controlled, phase 3 trials. *Lancet*, 399, 909-  
756 923. doi: 10.1016/S0140-6736(21)02348-5
- 757 Methfessel, C., Witzemann, V., Takahashi, T., Mishina, M., Numa, S. & Sakmann, B. (1986).  
758 Patch clamp measurements on *Xenopus laevis* oocytes: currents through endogenous channels  
759 and implanted acetylcholine receptor and sodium channels. *Pflugers Arch*, 407, 577-88. doi:  
760 10.1007/bf00582635
- 761 Miledi, R. (1982). A calcium-dependent transient outward current in *Xenopus laevis* oocytes.  
762 *Proc R Soc Lond B Biol Sci*, 215, 491-7. doi: 10.1098/rspb.1982.0056
- 763 Morice, A. H., Millqvist, E., Belvisi, M. G., Bieksiene, K., Birring, S. S., Chung, K. F., et al.  
764 (2014). Expert opinion on the cough hypersensitivity syndrome in respiratory medicine. *Eur*  
765 *Respir J*, 44, 1132-48. doi: 10.1183/09031936.00218613
- 766 Neese, F., Wennmohs, F., Becker, U. & Riplinger, C. (2020). The ORCA quantum chemistry  
767 program package. *J Chem Phys*, 152, 224108. doi: 10.1063/5.0004608
- 768 Nicke, A., Baumert, H. G., Rettinger, J., Eichele, A., Lambrecht, G., Mutschler, E., et al.  
769 (1998). P2X1 and P2X3 receptors form stable trimers: a novel structural motif of ligand-gated ion  
770 channels. *EMBO J*, 17, 3016-28. doi: 10.1093/emboj/17.11.3016
- 771 Niimi, A., Saito, J., Kamei, T., Shinkai, M., Ishihara, H., Machida, M., et al. (2022).  
772 Randomised trial of the P2X3 receptor antagonist sivopixant for refractory chronic cough. *Eur*  
773 *Respir J*, 59. doi: 10.1183/13993003.00725-2021
- 774 North, R. A. (2002). Molecular physiology of P2X receptors. *Physiol Rev*, 82, 1013-67. doi:  
775 10.1152/physrev.00015.2002
- 776 North, R. A. & Barnard, E. A. (1997). Nucleotide receptors. *Curr Opin Neurobiol*, 7, 346-57.  
777 doi: 10.1016/s0959-4388(97)80062-1
- 778 North, R. A. & Jarvis, M. F. (2013). P2X receptors as drug targets. *Mol Pharmacol*, 83, 759-  
779 69. doi: 10.1124/mol.112.083758

- 780 Obrecht, A. S., Urban, N., Schaefer, M., Rose, A., Kless, A., Meents, J. E., et al. (2019).  
781 Identification of aurintricarboxylic acid as a potent allosteric antagonist of P2X1 and P2X3  
782 receptors. *Neuropharmacology*, 158, 107749. doi: 10.1016/j.neuropharm.2019.107749
- 783 Oken, A. C., Krishnamurthy, I., Savage, J. C., Lisi, N. E., Godsey, M. H. & Mansoor, S. E.  
784 (2022). Molecular Pharmacology of P2X Receptors: Exploring Druggable Domains Revealed by  
785 Structural Biology. *Front Pharmacol*, 13, 925880. doi: 10.3389/fphar.2022.925880
- 786 Pang, Y. T., Pavlova, A., Tajkhorshid, E. & Gumbart, J. C. (2020). Parameterization of a drug  
787 molecule with a halogen sigma-hole particle using ffTK: Implementation, testing, and  
788 comparison. *J Chem Phys*, 153, 164104. doi: 10.1063/5.0022802
- 789 Phillips, J. C., Hardy, D. J., Maia, J. D. C., Stone, J. E., Ribeiro, J. V., Bernardi, R. C., et al.  
790 (2020). Scalable molecular dynamics on CPU and GPU architectures with NAMD. *J Chem Phys*,  
791 153, 044130. doi: 10.1063/5.0014475
- 792 Rome, L. H. & Lands, W. E. (1975). Structural requirements for time-dependent inhibition of  
793 prostaglandin biosynthesis by anti-inflammatory drugs. *Proc Natl Acad Sci U S A*, 72, 4863-5.  
794 doi: 10.1073/pnas.72.12.4863
- 795 Salm, E. J., Dunn, P. J., Shan, L., Yamasaki, M., Malewicz, N. M., Miyazaki, T., et al. (2020).  
796 TMEM163 Regulates ATP-Gated P2X Receptor and Behavior. *Cell Rep*, 31, 107704. doi:  
797 10.1016/j.celrep.2020.107704
- 798 Schmalzing, G., Gloor, S., Omay, H., Kroner, S., Appelhans, H. & Schwarz, W. (1991). Up-  
799 regulation of sodium pump activity in *Xenopus laevis* oocytes by expression of heterologous beta  
800 1 subunits of the sodium pump. *Biochem J*, 279 ( Pt 2), 329-36. doi: 10.1042/bj2790329
- 801 Schmidt, A., Alsop, R. J., Rimal, R., Lenzig, P., Jousen, S., Gervasi, N. N., et al. (2018).  
802 Modulation of DEG/ENaCs by Amphiphiles Suggests Sensitivity to Membrane Alterations.  
803 *Biophys J*, 114, 1321-1335. doi: 10.1016/j.bpj.2018.01.028
- 804 Sharp, C. J., Reeve, A. J., Collins, S. D., Martindale, J. C., Summerfield, S. G., Sargent, B. S.,  
805 et al. (2006). Investigation into the role of P2X(3)/P2X(2/3) receptors in neuropathic pain  
806 following chronic constriction injury in the rat: an electrophysiological study. *Br J Pharmacol*,  
807 148, 845-52. doi: 10.1038/sj.bjp.0706790
- 808 Souslova, V., Cesare, P., Ding, Y., Akopian, A. N., Stanfa, L., Suzuki, R., et al. (2000). Warm-  
809 coding deficits and aberrant inflammatory pain in mice lacking P2X3 receptors. *Nature*, 407,  
810 1015-7. doi: 10.1038/35039526
- 811 Spinaci, A., Buccioni, M., Dal Ben, D., Marucci, G., Volpini, R. & Lambertucci, C. (2021).  
812 P2X3 Receptor Ligands: Structural Features and Potential Therapeutic Applications. *Front*  
813 *Pharmacol*, 12, 653561. doi: 10.3389/fphar.2021.653561
- 814 Stolz, M., Klapperstuck, M., Kendzierski, T., Detro-Dassen, S., Panning, A., Schmalzing, G.,  
815 et al. (2015). Homodimeric anoctamin-1, but not homodimeric anoctamin-6, is activated by  
816 calcium increases mediated by the P2Y1 and P2X7 receptors. *Pflugers Arch*, 467, 2121-40. doi:  
817 10.1007/s00424-015-1687-3
- 818 Suadicani, S. O., Brosnan, C. F. & Scemes, E. (2006). P2X7 receptors mediate ATP release  
819 and amplification of astrocytic intercellular Ca<sup>2+</sup> signaling. *J Neurosci*, 26, 1378-85. doi:  
820 10.1523/JNEUROSCI.3902-05.2006
- 821 Tsuda, M., Kuboyama, K., Inoue, T., Nagata, K., Tozaki-Saitoh, H. & Inoue, K. (2009).  
822 Behavioral phenotypes of mice lacking purinergic P2X4 receptors in acute and chronic pain  
823 assays. *Mol Pain*, 5, 28. doi: 10.1186/1744-8069-5-28
- 824 Vane, J. R. (1971). Inhibition of prostaglandin synthesis as a mechanism of action for aspirin-  
825 like drugs. *Nat New Biol*, 231, 232-5. doi: 10.1038/newbio231232a0
- 826 Vanommeslaeghe, K., Hatcher, E., Acharya, C., Kundu, S., Zhong, S., Shim, J., et al. (2010).  
827 CHARMM general force field: A force field for drug-like molecules compatible with the  
828 CHARMM all-atom additive biological force fields. *J Comput Chem*, 31, 671-90. doi:  
829 10.1002/jcc.21367

- 830 Vanommeslaeghe, K. & Mackerell, A. D., Jr. (2012). Automation of the CHARMM General  
831 Force Field (CGenFF) I: bond perception and atom typing. *J Chem Inf Model*, 52, 3144-54. doi:  
832 10.1021/ci300363c
- 833 Vanommeslaeghe, K., Raman, E. P. & Mackerell, A. D., Jr. (2012). Automation of the  
834 CHARMM General Force Field (CGenFF) II: assignment of bonded parameters and partial  
835 atomic charges. *J Chem Inf Model*, 52, 3155-68. doi: 10.1021/ci3003649
- 836 Voilley, N., De Weille, J., Mamet, J. & Lazdunski, M. (2001). Nonsteroid anti-inflammatory  
837 drugs inhibit both the activity and the inflammation-induced expression of acid-sensing ion  
838 channels in nociceptors. *J Neurosci*, 21, 8026-33.
- 839 Wang, J., Wang, Y., Cui, W. W., Huang, Y., Yang, Y., Liu, Y., et al. (2018). Druggable  
840 negative allosteric site of P2X3 receptors. *Proc Natl Acad Sci U S A*, 115, 4939-4944. doi:  
841 10.1073/pnas.1800907115
- 842 Warner, T. D., Giuliano, F., Vojnovic, I., Bukasa, A., Mitchell, J. A. & Vane, J. R. (1999).  
843 Nonsteroid drug selectivities for cyclo-oxygenase-1 rather than cyclo-oxygenase-2 are associated  
844 with human gastrointestinal toxicity: a full in vitro analysis. *Proc Natl Acad Sci U S A*, 96, 7563-  
845 8. doi: 10.1073/pnas.96.13.7563
- 846 Weber, W. M., Liebold, K. M., Reifarth, F. W., Uhr, U. & Clauss, W. (1995). Influence of  
847 extracellular Ca<sup>2+</sup> on endogenous Cl<sup>-</sup> channels in *Xenopus* oocytes. *Pflugers Arch*, 429, 820-4.  
848 doi: 10.1007/bf00374806
- 849 Wolf, C., Rosefort, C., Fallah, G., Kassack, M. U., Hamacher, A., Bodnar, M., et al. (2011).  
850 Molecular determinants of potent P2X2 antagonism identified by functional analysis,  
851 mutagenesis, and homology docking. *Mol Pharmacol*, 79, 649-61. doi: 10.1124/mol.110.068700
- 852 Wolf, M. G., Hoefling, M., Aponte-Santamaria, C., Grubmuller, H. & Groenhof, G. (2010).  
853 g\_membed: Efficient insertion of a membrane protein into an equilibrated lipid bilayer with  
854 minimal perturbation. *J Comput Chem*, 31, 2169-74. doi: 10.1002/jcc.21507
- 855 Yu, W., He, X., Vanommeslaeghe, K. & Mackerell, A. D., Jr. (2012). Extension of the  
856 CHARMM General Force Field to sulfonyl-containing compounds and its utility in biomolecular  
857 simulations. *J Comput Chem*, 33, 2451-68. doi: 10.1002/jcc.23067

858 **6 Tables**

859

860 **Table 1**

861 Table 1: Concentration-response analysis of NSAIDs at the S15V-hP2X3R expressed in *X. laevis*  
 862 oocytes. n.d., not determined.

|                   | IC <sub>50</sub> , μM | 95 % CI IC <sub>50</sub> | Max. Inhibition at 1 mM | n  |
|-------------------|-----------------------|--------------------------|-------------------------|----|
| Diclofenac        | 138.2                 | 46.0 – 415.1             | 78.9 ± 3.7 %            | 10 |
| Flufenamic acid   | 221.7                 | 98.9 – 496.8             | 69.8 ± 3.8 %            | 10 |
| Flunixin          | 32.4                  | 11.6 – 90.2              | 53.7 ± 4.8 %            | 8  |
| Ibuprofen         | > 300                 | n.d.                     | n.d.                    | 8  |
| Meclofenamic acid | > 300                 | n.d.                     | n.d.                    | 9  |
| Naproxen          | > 300                 | n.d.                     | n.d.                    | 9  |

863

864 **Table 2**

865 Table 2: Concentration-response analysis of diclofenac at the indicated hP2XR subtypes  
 866 expressed in *X. laevis* oocytes. \*, no inhibition, but potentiation (c.f. Suppl. Fig. 3); n.d., not  
 867 determined.

|                                              | IC <sub>50</sub> , μM | 95 % CI IC <sub>50</sub> | Max. Inhibition at 1 mM | n  |
|----------------------------------------------|-----------------------|--------------------------|-------------------------|----|
| <sup>20</sup> KVIV <sup>23/26</sup> N-hP2X1R | 337.8                 | 88.7 – 643.1             | 86.2 ± 4.9 %            | 9  |
| hP2X2R                                       | no inh.*              | no inh.*                 | no inh.*                | 10 |
| hP2X2/3R                                     | 76.7                  | 64.6 – 91.2              | 97.0 ± 0.9 %            | 9  |
| S15V-hP2X3R                                  | 138.2                 | 46.0 – 415.1             | 78.9 ± 3.7 %            | 10 |
| hP2X4R                                       | 1,113                 | 208.2 – 5,948            | 61.2 ± 2.8 %            | 9  |
| hP2X7R                                       | >> 300                | n.d.                     | n.d.                    | 9  |

868

869

## 870 7 Legends to Figures

871 **Figure 1.** Chemical structures of the investigated NSAIDs (1-6).

872 **Figure 2.** Diclofenac inhibition of ATP-induced currents of the P2X3R is concentration  
873 dependent. The effect of diclofenac on ATP-induced (1  $\mu$ M) currents through S15V- hP2X3R (A)  
874 and S15V- rP2X3R (B) expressed in *X. laevis* oocytes was analyzed by TEVC electrophysiology.  
875 (A, B) Representative original current traces show the effects of 300  $\mu$ M diclofenac on ATP-  
876 induced (black bars) currents of the indicated P2X3R. To ensure a binding equilibrium was  
877 reached, diclofenac was pre-incubated for 30 s before adding ATP (grey bar). (C) The resulting  
878 concentration–inhibition curve of diclofenac at the hP2X3R exhibited an IC<sub>50</sub> of 138.2  $\mu$ M (95%  
879 CI: 46.0 - 415.1  $\mu$ M). Data points represent the means and SEM.

880 **Figure 3.** Effect of diclofenac at heteromeric hP2X2/3R and selectivity profiling. (A)  
881 Representative original current traces show the effects of 3 - 1000  $\mu$ M diclofenac (grey bars) on  
882  $\alpha$ , $\beta$ -meATP-induced (1  $\mu$ M, black bars) currents through heteromeric hP2X2/3R expressed in *X.*  
883 *laevis* oocytes. (B) Concentration–inhibition curve of diclofenac at the indicated P2XR isoforms  
884 are shown as obtained from TEVC measurements using a peak current (P2X1R, P2X3R) or  
885 steady state (P2X2/3R, P2X4R) protocol (c.f. Suppl. Figs. 1/2). All IC<sub>50</sub> values are summarized in  
886 Table 2.

887 **Figure 4.** Diclofenac inhibition is modulated by the agonist concentration and the L<sup>191</sup>A mutant.  
888 (A) Bar graph showing the inhibition of the heteromeric hP2X2/3R by 30  $\mu$ M diclofenac as  
889 determined with agonist concentrations of 1  $\mu$ M or 30  $\mu$ M  $\alpha$ , $\beta$ -meATP as indicated (1  $\mu$ M  $\alpha$ , $\beta$ -  
890 meATP, 44.8  $\pm$  21.9 %, n = 7; 30  $\mu$ M  $\alpha$ , $\beta$ -meATP, 25.1  $\pm$  10.1 %, n = 7). Inhibition by 30  $\mu$ M  
891 diclofenac could be overcome by increasing concentrations of  $\alpha$ , $\beta$ -meATP. (B) Comparative  
892 analysis of diclofenac inhibition of 10  $\mu$ M ATP-induced currents of the S<sup>15</sup>V- hP2X3R and  
893 L<sup>191</sup>A/S<sup>15</sup>V- hP2X3R. Bar graphs showing the inhibition of the indicated receptor by 3, 10 or 30  
894  $\mu$ M diclofenac (% inhibition  $\pm$  SEM: 3  $\mu$ M diclofenac: S<sup>15</sup>V -1.6  $\pm$  2.02 %, n = 8 and L<sup>191</sup>A/S<sup>15</sup>V  
895 7.7  $\pm$  3.5 %, n = 17; 10  $\mu$ M diclofenac: S<sup>15</sup>V 5.9  $\pm$  3.9 %, n = 12 and L<sup>191</sup>A/S<sup>15</sup>V 18.4  $\pm$  3.3 %, n  
896 = 16; 30  $\mu$ M diclofenac: S<sup>15</sup>V 24.0  $\pm$  6.2 %, n = 8 and L<sup>191</sup>A/S<sup>15</sup>V 37.3  $\pm$  2.8 %, n = 20. The  
897 L<sup>191</sup>A mutant is inhibited to a greater extent by diclofenac.

898 **Figure 5.** Competitive mechanism of action as revealed by extensive all atom molecular  
899 dynamics simulations. (A) Surface representation of apo-state P2X3 (PDB: 5SVJ) with bound  
900 diclofenac (as obtained in our MD simulations) in the agonist binding pocket between two  
901 adjacent subunits. (B) Close-up of the diclofenac-binding pocket as in (A). (C) Average structure  
902 of the most frequently observed binding pose of diclofenac in P2X3 wildtype. Interacting residues  
903 within 4 Å distance are shown as sticks. (D) Same as D in the apo state L191A mutant. The  
904 average structure of the first cluster of the independent simulations of the mutant show a nearly  
905 identical binding pose. (E) RMSF (root-mean-square fluctuation) of the left flipper domain for  
906 apo state P2X3 wildtype with and without bound diclofenac to the agonist binding pocket. (F)  
907 Open state P2X3 with bound ATP (PDB: 5SVK) overlaps with bound diclofenac when being  
908 aligned with apo-closed state. AF-219 (PDB: 5YVE) binds to a lower cavity.

909 **Figure 6.** Diclofenac inhibition of P2X2/3R currents in dissociated porcine DRGs. (A)  
910 Representative original current traces of one porcine DRG neuron exposed four times for 3s to 10  
911  $\mu$ M  $\alpha$ , $\beta$ -meATP in 3 minutes intervals. Please note that the neurons were exposed to five  
912 applications and that the first application is not shown here. Before the fourth application, 100  $\mu$ M  
913 diclofenac was pre-incubated for 20s before 10  $\mu$ M  $\alpha$ , $\beta$ -meATP and 100  $\mu$ M diclofenac was co-  
914 applied. (B) Representative picture of dissociated porcine DRGs at day 2 in culture. In the center  
915 a middle sized DRG neuron is visible. Scale bar = 50  $\mu$ m. (C) Bar graphs showing the relative  
916 diclofenac inhibition as calculated by the quotient of the max.  $\alpha$ , $\beta$ -meATP-induced peak current

917 amplitude of the forth application (in presence of diclofenac) vs. the preceding 3rd ATP  
918 application (mean Block =  $70.2 \pm 34.3$  %) (left bar) or vs. the mean of the preceding (3<sup>rd</sup>) and  
919 following (5<sup>th</sup>)  $\alpha,\beta$ -meATP application (mean Block =  $70.9 \pm 37.2$  %) (right bar).

920 **Figure 7.** FFA inhibits P2X3R-mediated responses but potentiates hP2X2R-mediated responses.  
921 (A) Concentration–inhibition curve of FFA at the human (●) and rat (□) S<sup>15</sup>V-P2X3R exhibited  
922 IC<sub>50</sub> values of 221.7  $\mu$ M (95% CI: 98.9 - 497  $\mu$ M) and 264.1  $\mu$ M (95% CI: 56.9 - 612  $\mu$ M),  
923 respectively. Data points represent the means and SEM. (B) Representative original current trace  
924 shows the effect of 1 mM diclofenac (grey bar) on the ATP-induced (10  $\mu$ M, black bar) current  
925 mediated by the hP2X2R expressed in *X. laevis* oocytes. (C) Concentration–response curve of  
926 FFA at the hP2X2R (●) exhibited half maximal potentiation value of 43.9  $\mu$ M (95% CI: 10.6 -  
927 182.5  $\mu$ M). Data points represent the means and SEM.

928 **8 Conflict of Interest**

929 The authors declare that the research was conducted in the absence of any commercial or financial  
930 relationships that could be construed as a potential conflict of interest.

931

932 **9 Author Contributions**

933 LG, AO, GS, JM, AL, and RH were involved in study design; LG, LC, SC, **BH**, IT, JK, LE, JM,  
934 AL, and RH were involved in data collection and interpretation. LG wrote the first draft of the  
935 manuscript. All authors contributed to manuscript revision, read, and approved the submitted  
936 version.

937

938 **10 Funding**

939 This study was funded by grants from Deutsche Forschungsgemeinschaft (DFG), Germany [grant  
940 numbers HA 6095/1-1 and HA 6095/1-2] to RH and to JM [grant number MA 7525/2-1, as part  
941 of the Research Unit FOR 5046, project P2] and by a grant from the Interdisciplinary Centre for  
942 Clinical Research within the faculty of Medicine at the RWTH Aachen University [IZKF TN1-  
943 1/IA 532001 and TN1-5/IA 532005].

944

945 **11 Acknowledgments**

946 The authors gratefully acknowledge the computing time granted through JARA on the  
947 supercomputer JURECA at Forschungszentrum Jülich and the supercomputer CLAIX at RWTH  
948 Aachen University.

949

950 **12 Supplementary Material**

951 **12.1 Supplementary Figures and Tables**

952 Supplementary Figures are available under the following link ..... .

953

954 **13 Data Availability Statement**

955 Relevant materials such as study material (e.g. cDNA of oocyte expression plasmids of the P2XR  
956 under study) or individual datasets are available upon request to interested researchers. If desired,  
957 the corresponding author Ralf Hausmann, RWTH Aachen University, Germany should be  
958 contacted via email (rhausmann@ukaachen.de).



Figure 1

1) diclofenac

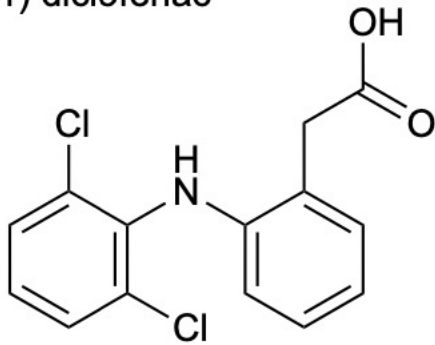

2) flufenamic acid

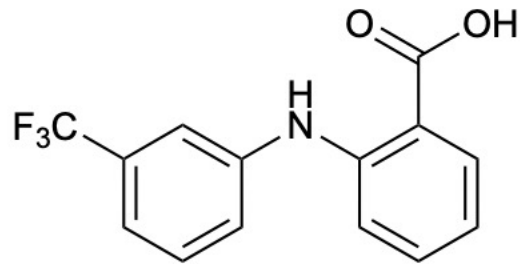

3) flunixin

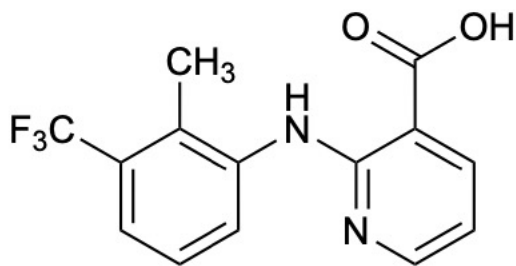

4) meclofenamic acid

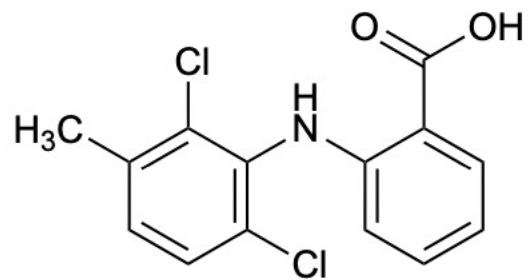

5) naproxen

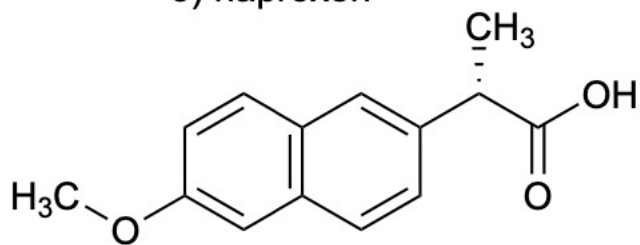

6) ibuprofen

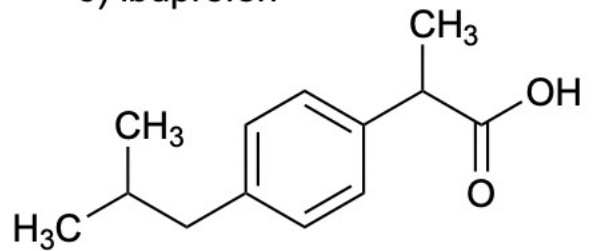

**Figure 2**

**A**

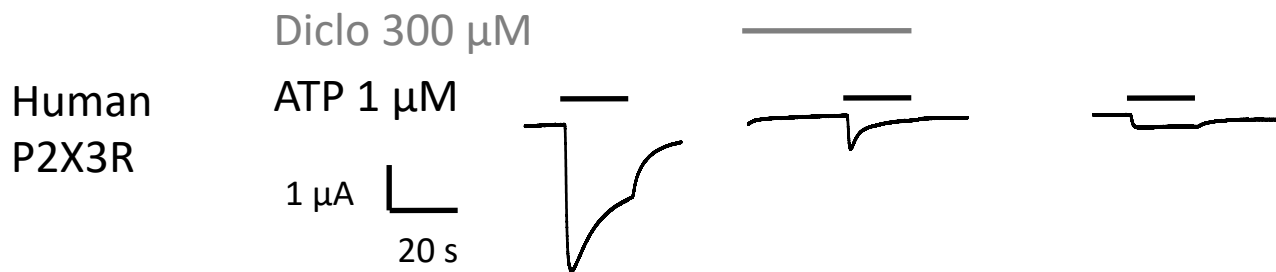

**B**

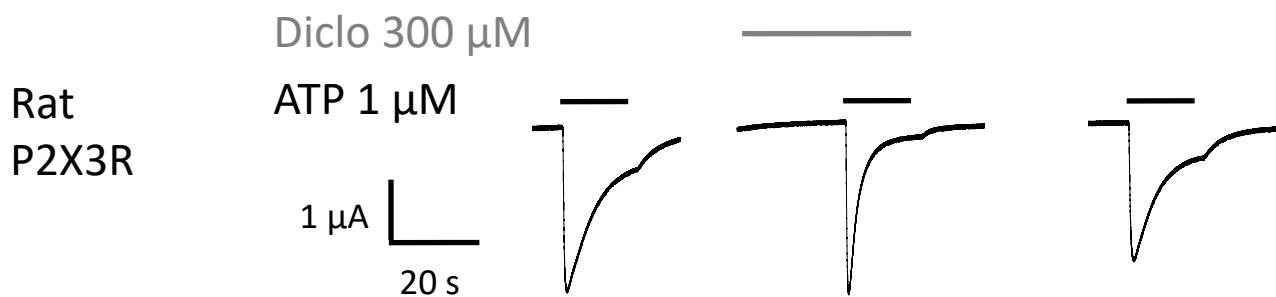

**C**

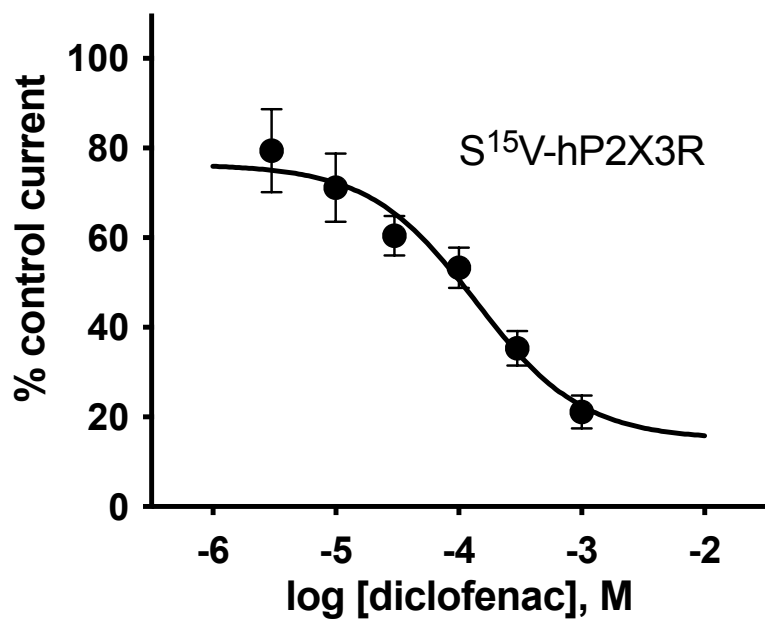

**Figure 3**

A

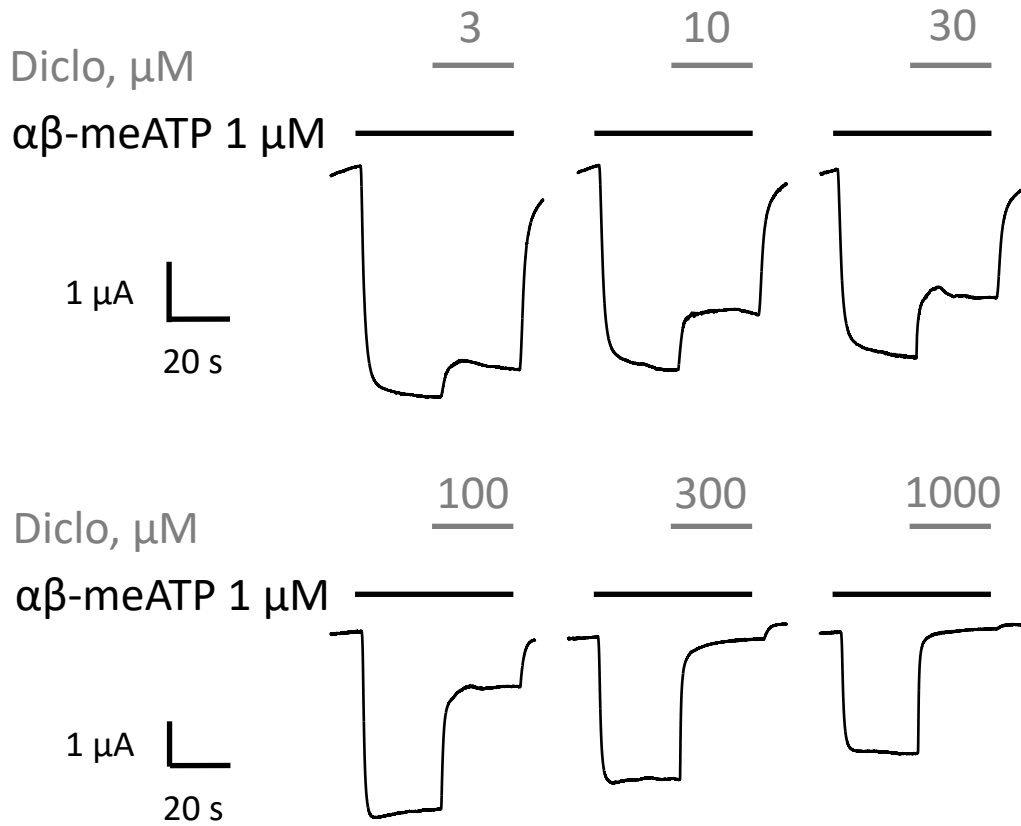

B

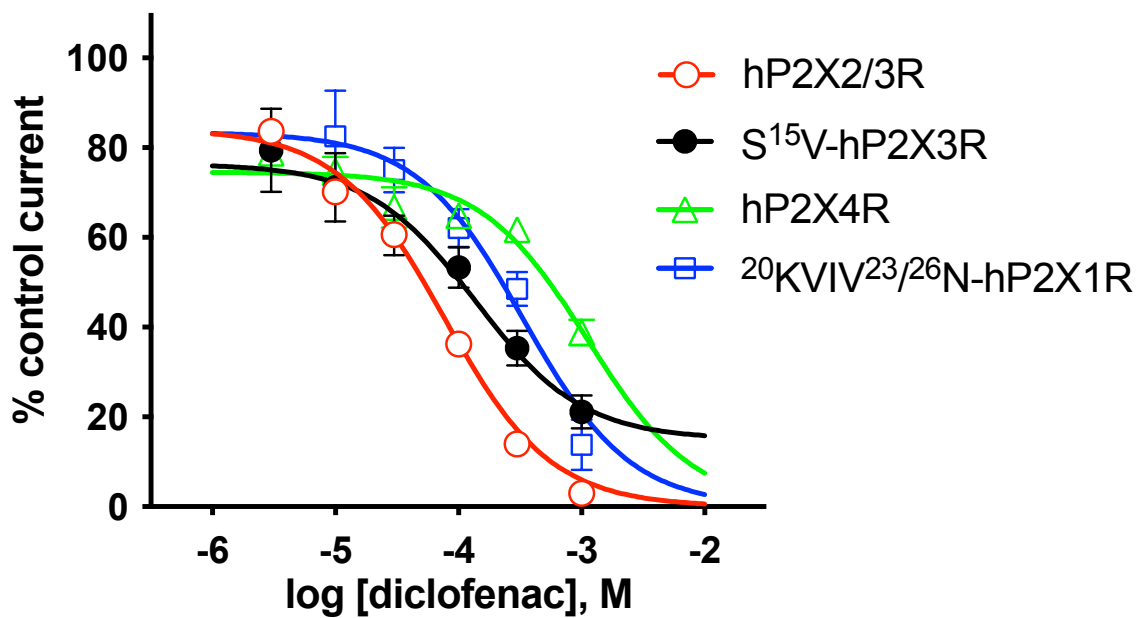

Figure 4

A

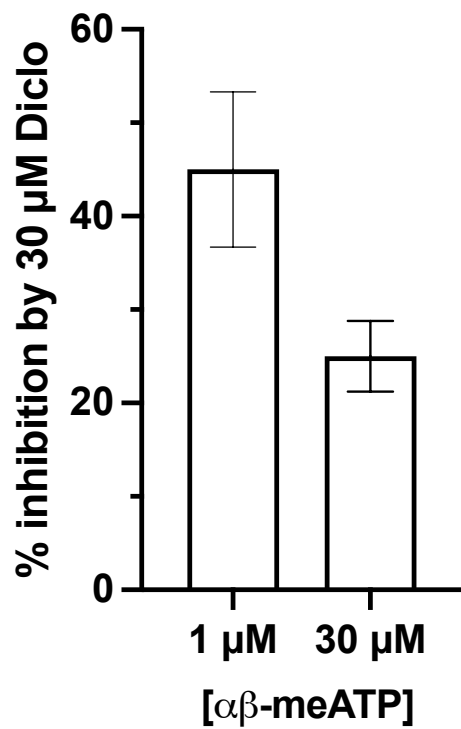

B

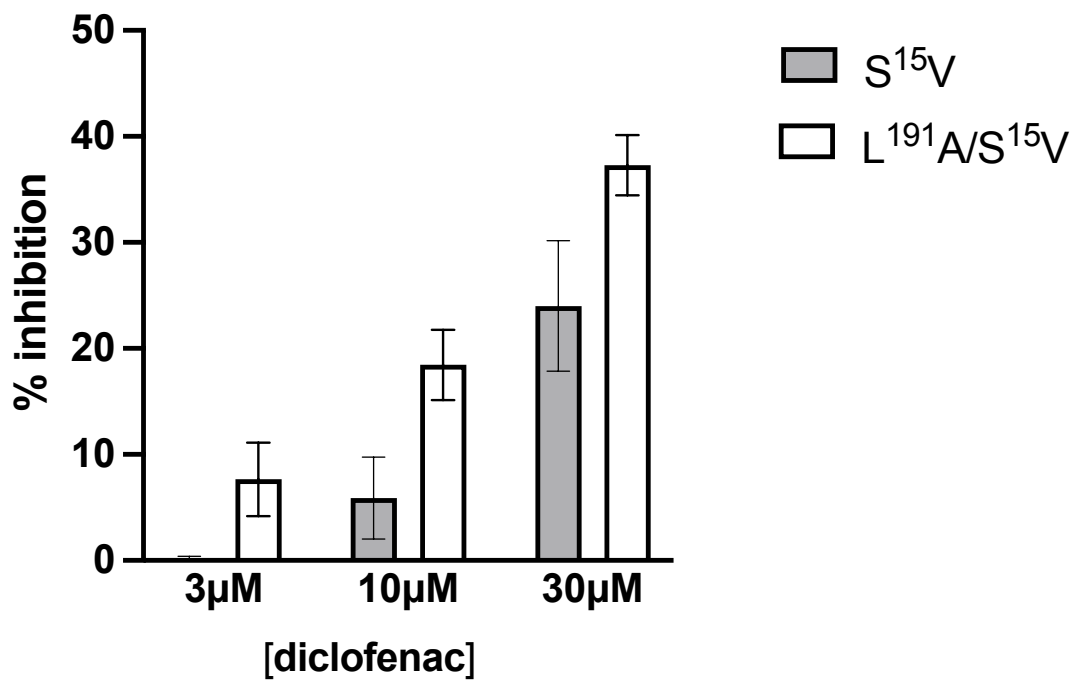

Figure 5

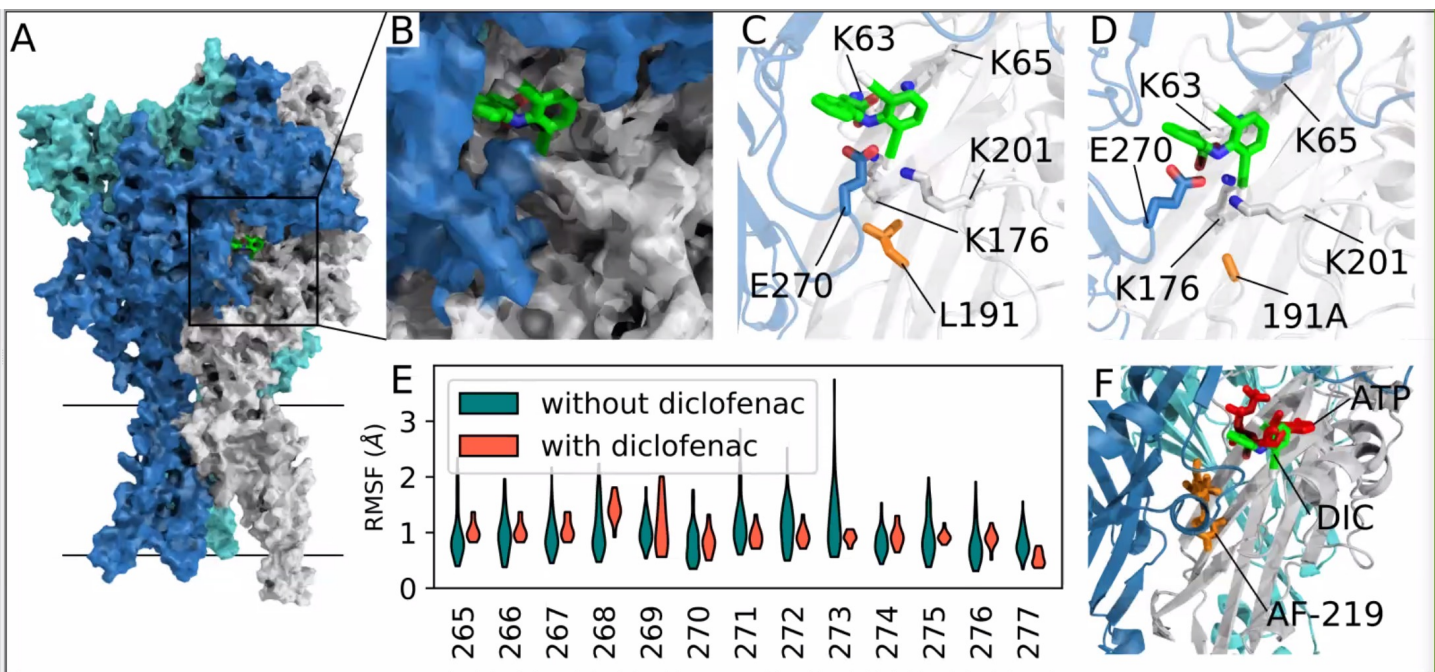

**Figure 6**

**A**

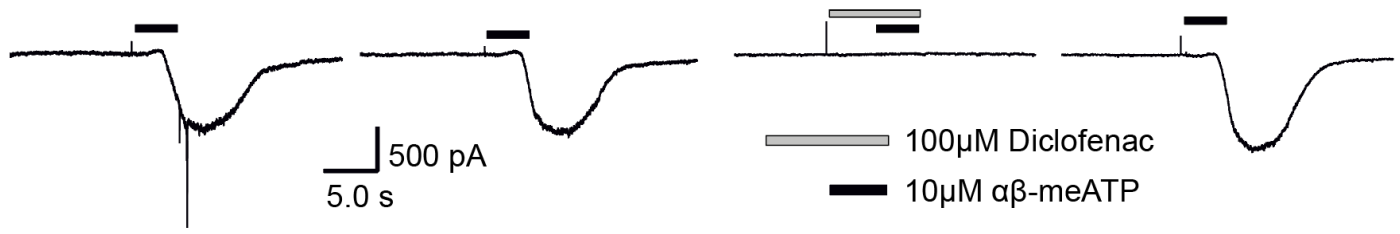

**B**

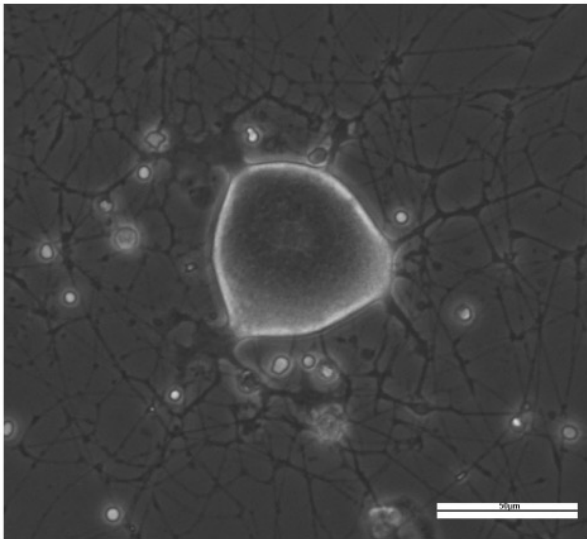

**C**

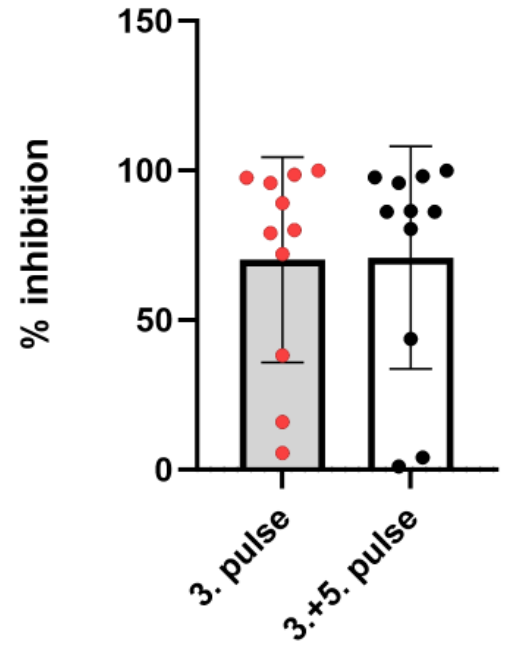

Figure 7

A

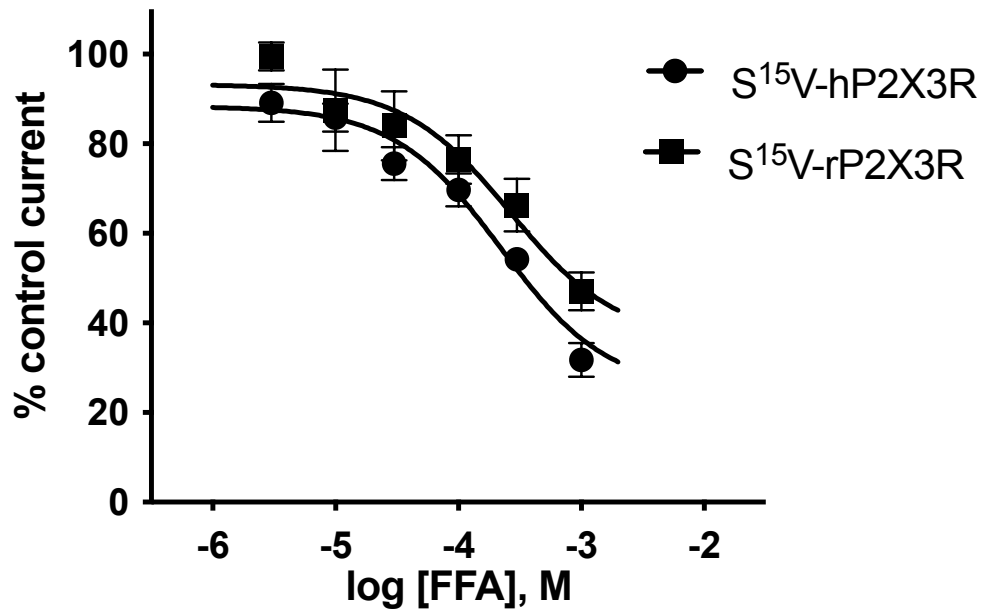

B

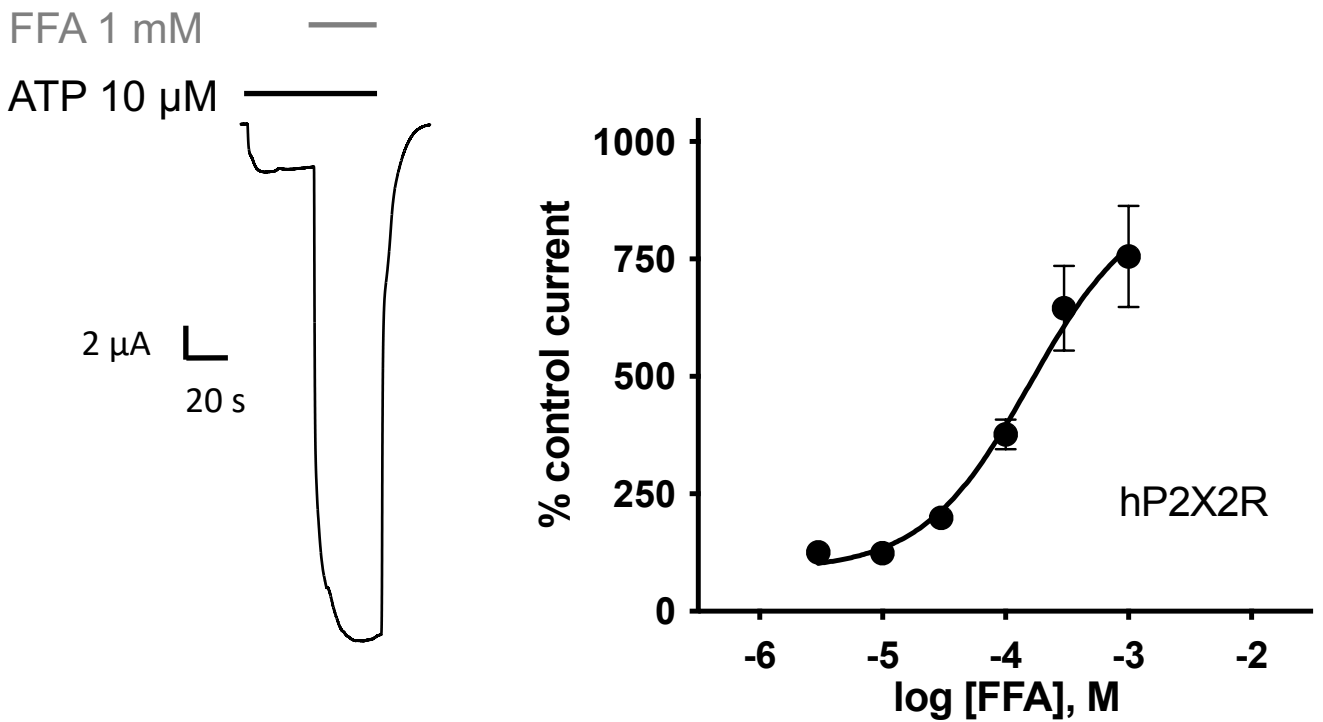

Source: https://www.biorxiv.org/content/10.1101/2022.12.19.520978v1.full.pdf
